# Supplementary material
Source: PubMed Central journal article supplement (PMC6484853)
Supplement: NIHMS1023935-supplement-Supplement.pdf [file NIHMS1023935-supplement-Supplement.pdf]

In the format provided by the authors and unedited.

# Combination of ERK and autophagy inhibition as a treatment approach for pancreatic cancer

Kirsten L. Bryant<sup>1</sup>, Clint A. Stalnecker<sup>1</sup>, Daniel Zeitouni<sup>1</sup>, Jennifer E. Klomp<sup>1</sup>, Sen Peng<sup>2</sup>, Andrey P. Tikunov<sup>3</sup>, Venugopal Gunda<sup>4</sup>, Mariaelena Pierobon<sup>5</sup>, Andrew M. Waters<sup>1</sup>, Samuel D. George<sup>1</sup>, Garima Tomar<sup>1</sup>, Björn Papke<sup>1</sup>, G. Aaron Hobbs<sup>1</sup>, Liang Yan<sup>6</sup>, Tikvah K. Hayes<sup>7</sup>, J. Nathaniel Diehl<sup>7</sup>, Gennifer D. Goode<sup>4</sup>, Nina V. Chaika<sup>4</sup>, Yingxue Wang<sup>8</sup>, Guo-Fang Zhang<sup>8</sup>, Agnieszka K. Witkiewicz<sup>9</sup>, Erik S. Knudsen<sup>10</sup>, Emanuel F. Petricoin III<sup>5</sup>, Pankaj K. Singh<sup>4</sup>, Jeffrey M. Macdonald<sup>3</sup>, Nhan L. Tran<sup>11</sup>, Costas A. Lyssiotis<sup>12</sup>, Haoqiang Ying<sup>6</sup>, Alec C. Kimmelman<sup>13</sup>, Adrienne D. Cox<sup>1,14,15</sup> and Channing J. Der<sup>1,7,15\*</sup>

<sup>1</sup>Lineberger Comprehensive Cancer Center, University of North Carolina at Chapel Hill, Chapel Hill, NC, USA. <sup>2</sup>Cancer and Cell Biology Division, Translational Genomics Research Institute, Phoenix, AZ, USA. <sup>3</sup>Biomedical Engineering, University of North Carolina at Chapel Hill, Chapel Hill, NC, USA. <sup>4</sup>Eppley Institute for Cancer Research, University of Nebraska Medical Center, Omaha, NE, USA. <sup>5</sup>Center for Applied Proteomics and Molecular Medicine, George Mason University, Fairfax, VA, USA. <sup>6</sup>Department of Molecular and Cellular Oncology, Division of Basic Science Research, The University of Texas MD Anderson Cancer Center, Houston, TX, USA. <sup>7</sup>Curriculum in Genetics and Molecular Biology, University of North Carolina at Chapel Hill, Chapel Hill, NC, USA. <sup>8</sup>Sarah W. Stedman Nutrition and Metabolism Center & Duke Molecular Physiology Institute, Department of Medicine, Duke University, Durham, NC, USA. <sup>9</sup>Center for Personalized Medicine, Roswell Park Cancer Center, Buffalo, NY, USA. <sup>10</sup>Department of Molecular and Cell Biology, Roswell Park Cancer Center, Buffalo, NY, USA. <sup>11</sup>Department of Cancer Biology, Mayo Clinic, Phoenix, AZ, USA. <sup>12</sup>Department of Molecular and Integrative Physiology; Department of Internal Medicine, Division of Gastroenterology and University of Michigan Comprehensive Cancer Center, Ann Arbor, MI, USA. <sup>13</sup>Perlmutter Cancer Center, NYU Langone Medical Center, New York City, NY, USA. <sup>14</sup>Department of Radiation Oncology, University of North Carolina at Chapel Hill, Chapel Hill, NC, USA. <sup>15</sup>Department of Pharmacology, University of North Carolina at Chapel Hill, Chapel Hill, NC, USA.

\*e-mail: [cjder@med.unc.edu](mailto:cjder@med.unc.edu)

# Supplementary Figure 1a-d

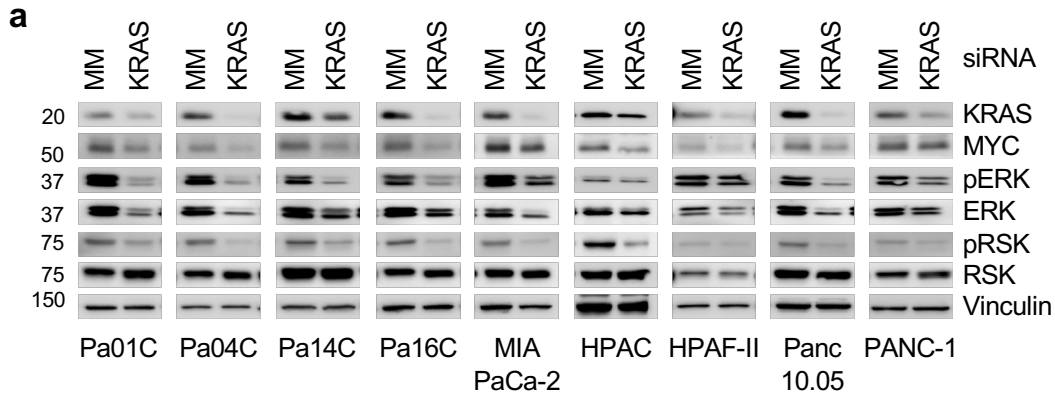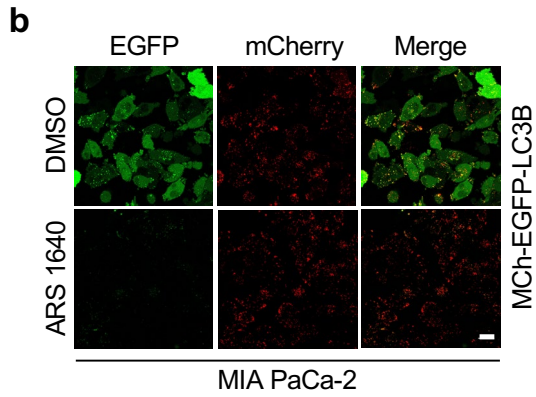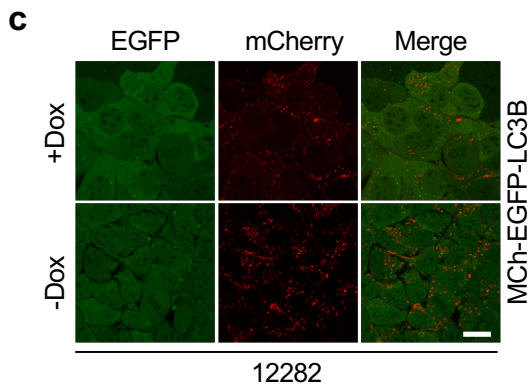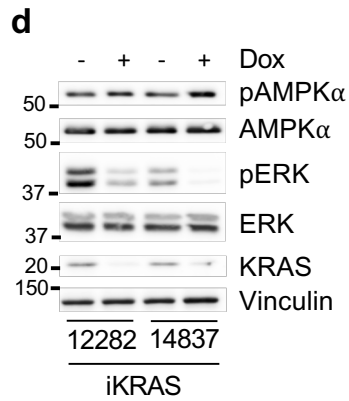

# Supplementary Figure 1e-k

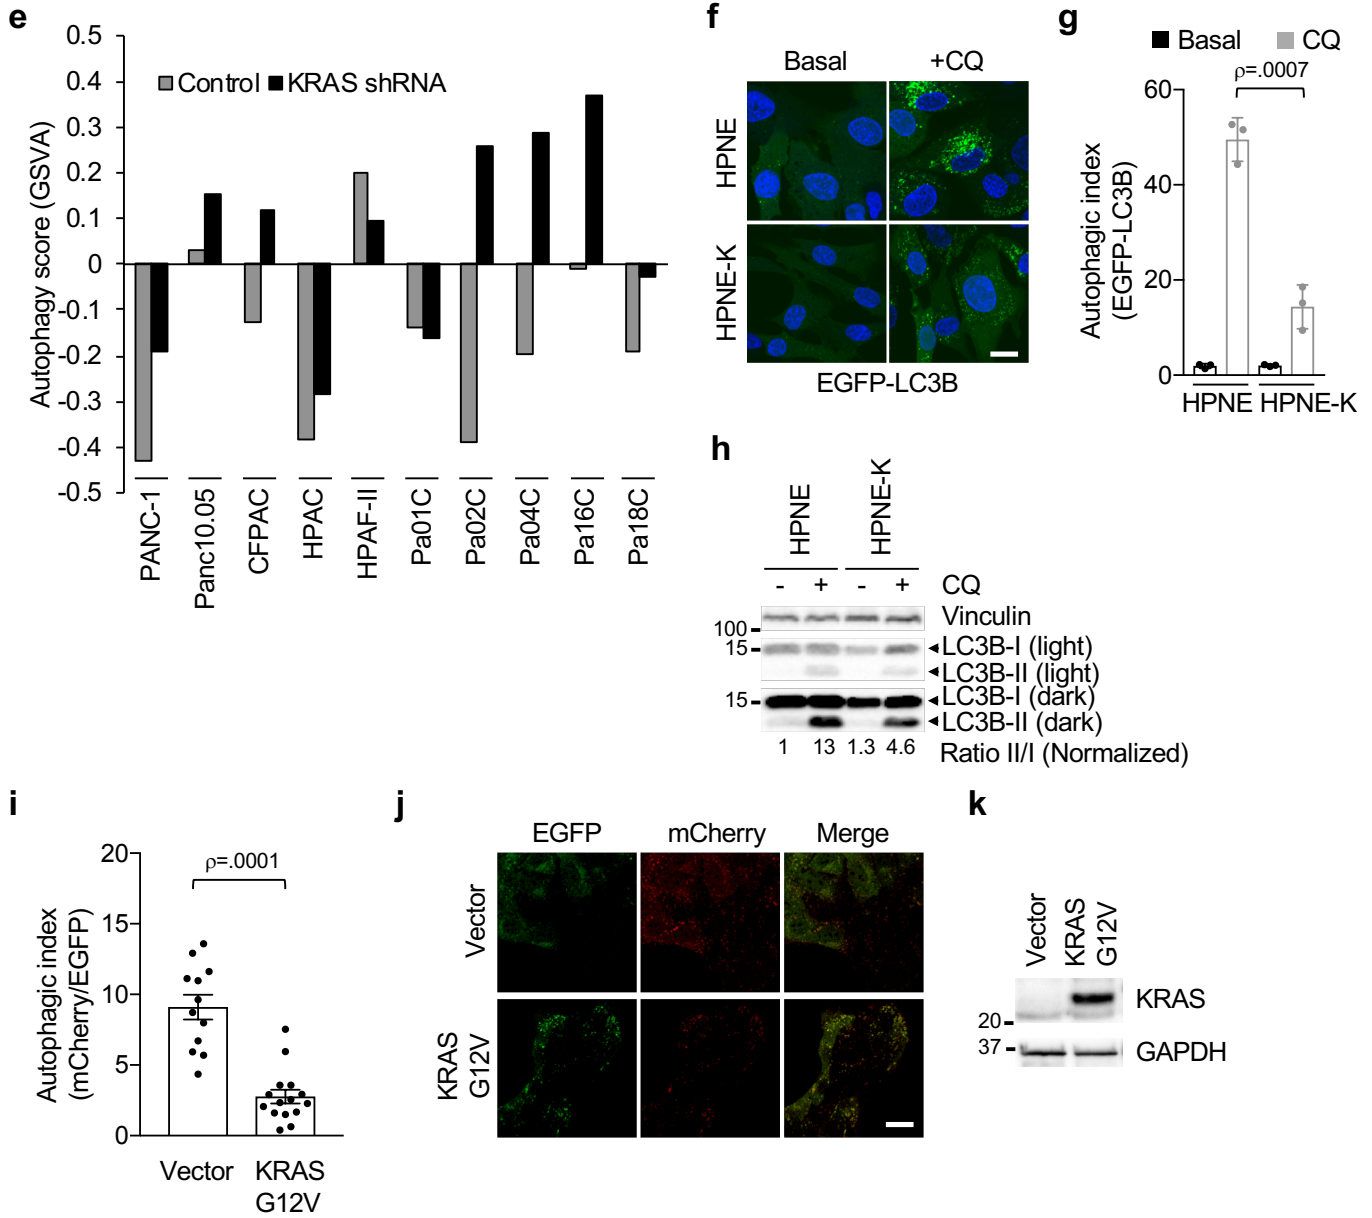

**Supplementary Figure 1 | Genetic suppression of mutant KRAS increases autophagic flux in**

**PDAC cell lines. a,** Immunoblots of cell lines analyzed in Fig. 1a-c showing relative KRAS levels pre- and post- siRNA mediated knockdown. MYC, pERK, total ERK and pRSK, and total RSK were probed to assess downstream signaling, and vinculin was probed to show total protein. Data for HPAC, PANC-1, MIA PaCa-2, Pa01C, and Pa14C are representative of two independent experiments and for HPAF-II, Pa04C, and Pa16C cells, one independent experiment. **b,** Representative images corresponding to Fig. 1c. **c,** Representative images of cells described and quantified in (Fig. 1e). Scale bar = 20  $\mu$ m. **d,** iKRAS cells were treated as shown to deplete KRAS (Dox) or inhibit autophagic flux (Baf) and immunoblots were done to determine the levels of phosphorylated AMPK $\alpha$  (pAMPK $\alpha$ ), total AMPK $\alpha$ , KRAS, and vinculin, representative of three independent experiments. **e,** A panel of 10 PDAC cell lines was stably transduced with shRNA targeting *KRAS* (KRAS shRNA) or a nonspecific control (Control) for 72-120 h. Cells were collected and RNA-Seq analysis was performed. GSVA was performed in order to estimate the variation of different metabolic pathway activities upon KRAS KD in a non-supervised manner. Shown are GSVA scores for a panel of autophagy-related genes. **f,** Control and KRAS<sup>G12V</sup>-transformed human pancreatic nestin-expressing cells (HPNE and HPNE-K, respectively) were infected with a lentiviral vector to stably express EGFP-LC3B. Representative images of cells treated with and without chloroquine (CQ, 16 h) to monitor autophagic flux. Blue: DAPI. **g,** Quantification of EGFP positive punctae area normalized to cell area (autophagic index). Mean autophagic index is plotted, with each individual data point representing one field containing at least ten analyzed cells. Data shown are the average of three biological replicates,  $\rho$  values from two-sided, unpaired t-test, comparing average autophagic index across three replicates following CQ treatment, error bars denote S.E.M. **h,** Immunoblot analyses of cell lysates from control HPNE and KRAS<sup>G12V</sup>-transformed HPNE (HPNE-K) cells treated with or without CQ (16 h) were done

to determine the levels of LC3B and vinculin. **i**, RIE-1 cells stably expressing EGFP-mCherry-LC3B were subsequently stably infected with KRAS<sup>G12V</sup> or empty vector and autophagic flux was assessed. Mean autophagic index is plotted, with each individual data point representing one field containing at least ten analyzed cells. Data are representative of two biological replicates,  $\rho$  value from two-sided, unpaired *t*-test, error bars: S.E.M. **j**, Representative images of cells quantified in **(i)**. **k**, Immunoblot analysis demonstrating relative KRAS levels among mutants, GAPDH shows total protein is representative of two independent experiments.

# Supplementary Figure 2a

a

RPPA

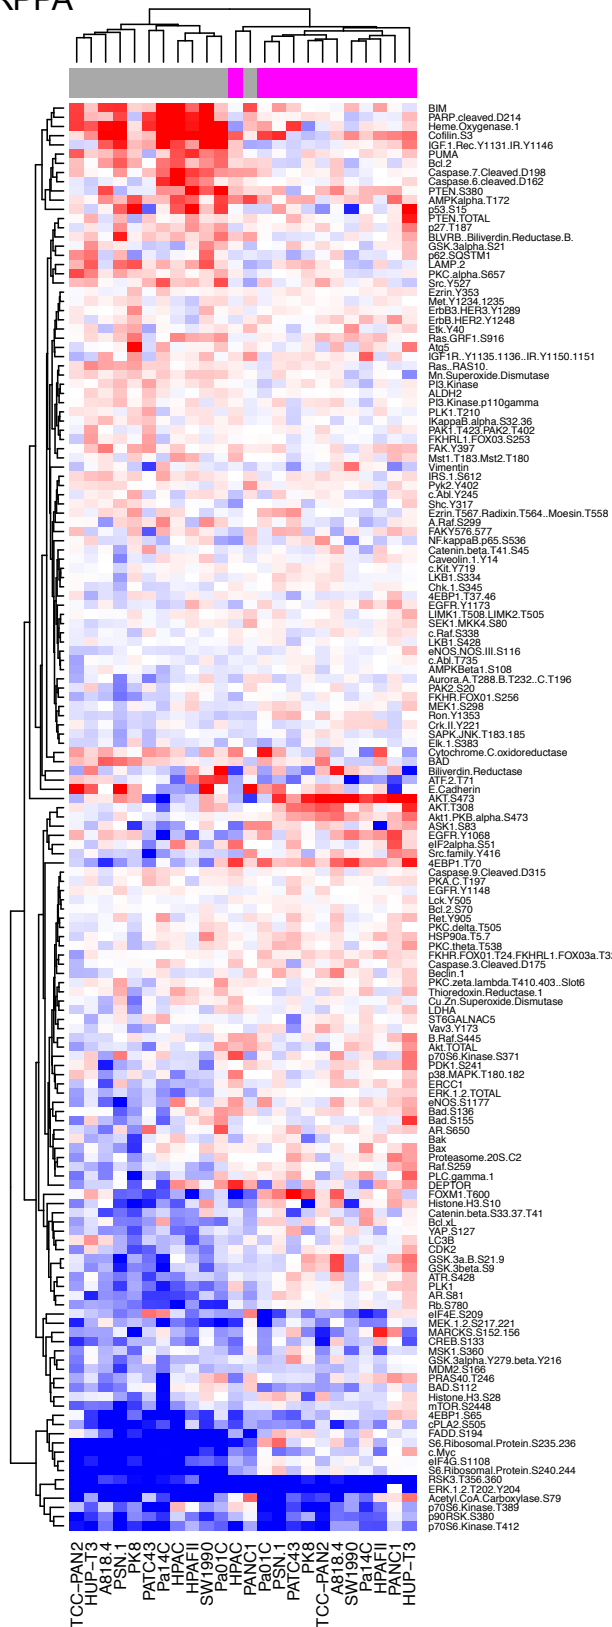

SCH772984  
treatment (h)

1  
24

log<sub>2</sub>FC  
protein expression

<-1 -0.5 0 0.5 >1

- BIM
- PARP cleaved.D214
- Heme.Oxygenase.1
- Collin.S3
- GF.1.Rac.Y1131.IR.Y1146
- PUMA
- Bcl.2
- Caspase.7.Cleaved.D198
- Caspase.8.cleaved.D162
- PTEN.S380
- AMPK.alpha.T172
- SOS.S1
- PTEN.TOTAL
- p27.T197
- BVLRB.Biliverdin.Reductase.B.
- GSK.3.alpha.S21
- p62.SQSTM1
- LAMP2
- PKC.alpha.S657
- Src.Y527
- Ezrin.Y353
- Met.Y1234.1235
- ErbB3.HER3.Y1289
- ErbB.HER2.Y1248
- Elk.Y40
- Ras.GRF1.S916
- Akt
- GFPR.Y1135.1136.IR.Y1150.1151
- Ras.RAS10
- Mn.Superoxide.Dismutase
- PK.Kinase
- ALDH2
- PK.Kinase.p110gamma
- PLK1.T210
- KappaB.alpha.S32.36
- PAK1.T423.PAK2.T402
- FKHR1.FOXO3.S253
- FAK.Y387
- Mst1.T183.Mst2.T180
- Vimentin
- IRS.1.S612
- Fyk2.Y402
- c.Abl.Y245
- Shc.Y317
- Ezrin.1567.Radixin.T564.Moesin.T558
- A.Raf.S299
- FAK.Y326.Y377
- NF.kappaB.p65.S536
- Catenin.beta.T41.S45
- Caveolin.1.Y14
- c.Ki.Y719
- LRG1.S334
- Chk.1.S345
- 4EBP1.T317.46
- EGFR.Y1173
- LIMK1.T508.LIMK2.T505
- SEK1.MKK4.S80
- c.Raf.S338
- LRG1.S328
- eNOS.NOS.III.S116
- c.Abl.T735
- AMPK.Beta1.S108
- Aurora.A.T288.B.T232.C.T196
- PAK2.S20
- FKHR.FOXO1.S256
- MEK1.S269
- Ron.Y1353
- CklI.Y211
- SAPK.JNK.T183.185
- Elk.1.S383
- Cytochrome.C.oxidoreductase
- BAD
- Biliverdin.Reductase
- ATF.2.T71
- c.Cadherin
- AKT1.S473
- AKT1.S308
- Akt1.PKB.alpha.S473
- ASK1.S85
- EGFR.Y1066
- eIF2.alpha.S51
- Src.family.Y416
- 4EBP1.T70
- Caspase.9.Cleaved.D315
- PKA.C.1197
- EGFR.Y1148
- Lck.Y355
- Bcl.2.S70
- Rit.Y85
- PKC.delta.T505
- HSP90A.T5.7
- PKC.beta.T338
- FKHR.FOXO1.T24.FKHR.L1.FOXO3a.T32
- Caspase.3.Cleaved.D175
- Beclin1
- PKC.zeta.lambda.T410.403.Slot6
- Thioredoxin.Reductase.1
- Cu.Zn.Superoxide.Dismutase
- LDHA
- STGALNAC5
- Ndc80.Y173
- B.Raf.S445
- Akt.TOTAL
- G70S6.Kinase.S371
- PKM1.S241
- G3S.MARK1.T180.182
- ERCC1
- ERK.1.2.TOTAL
- eNOS.S1177
- Bad.S136
- Bad.S150
- AR.S650
- Bax
- Proteasome.20S.C2
- Raf.S259
- PLC.gamma.1
- DEAF1
- FOXM1.T600
- Histone.H3.S10
- Catenin.beta.S33.37.T41
- Bcl.L
- VAP.S127
- CDK2
- CDK2
- GSK.3a.B.S21.9
- GSK.3beta.S9
- ATR.S428
- PLK
- AR.S81
- Rb.S780
- nifHE.S209
- MEK.1.2.S217.221
- MARCKS.S152.156
- CREB.S133
- MSK1.S380
- GSK.3.alpha.Y279.beta.Y216
- MDM2.S166
- PKA.S40.L246
- BAD.S112
- Histone.H3.S28
- mTOR.S2448
- 4EBP1.S65
- cPLA2.S505
- FADD.S194
- S6.Fibronectin.Protein.S235.236
- c.Myc
- nifIG.S1108
- S6.Ribosomal.Protein.S240.244
- RSK3.T356.360
- ERK.1.2.T202.Y204
- Acetyl.CoA.Carboxylase.S79
- p70S6.Kinase.T389
- p90RSK.S380
- p70S6.Kinase.T412

## Supplementary Figure 2b

b

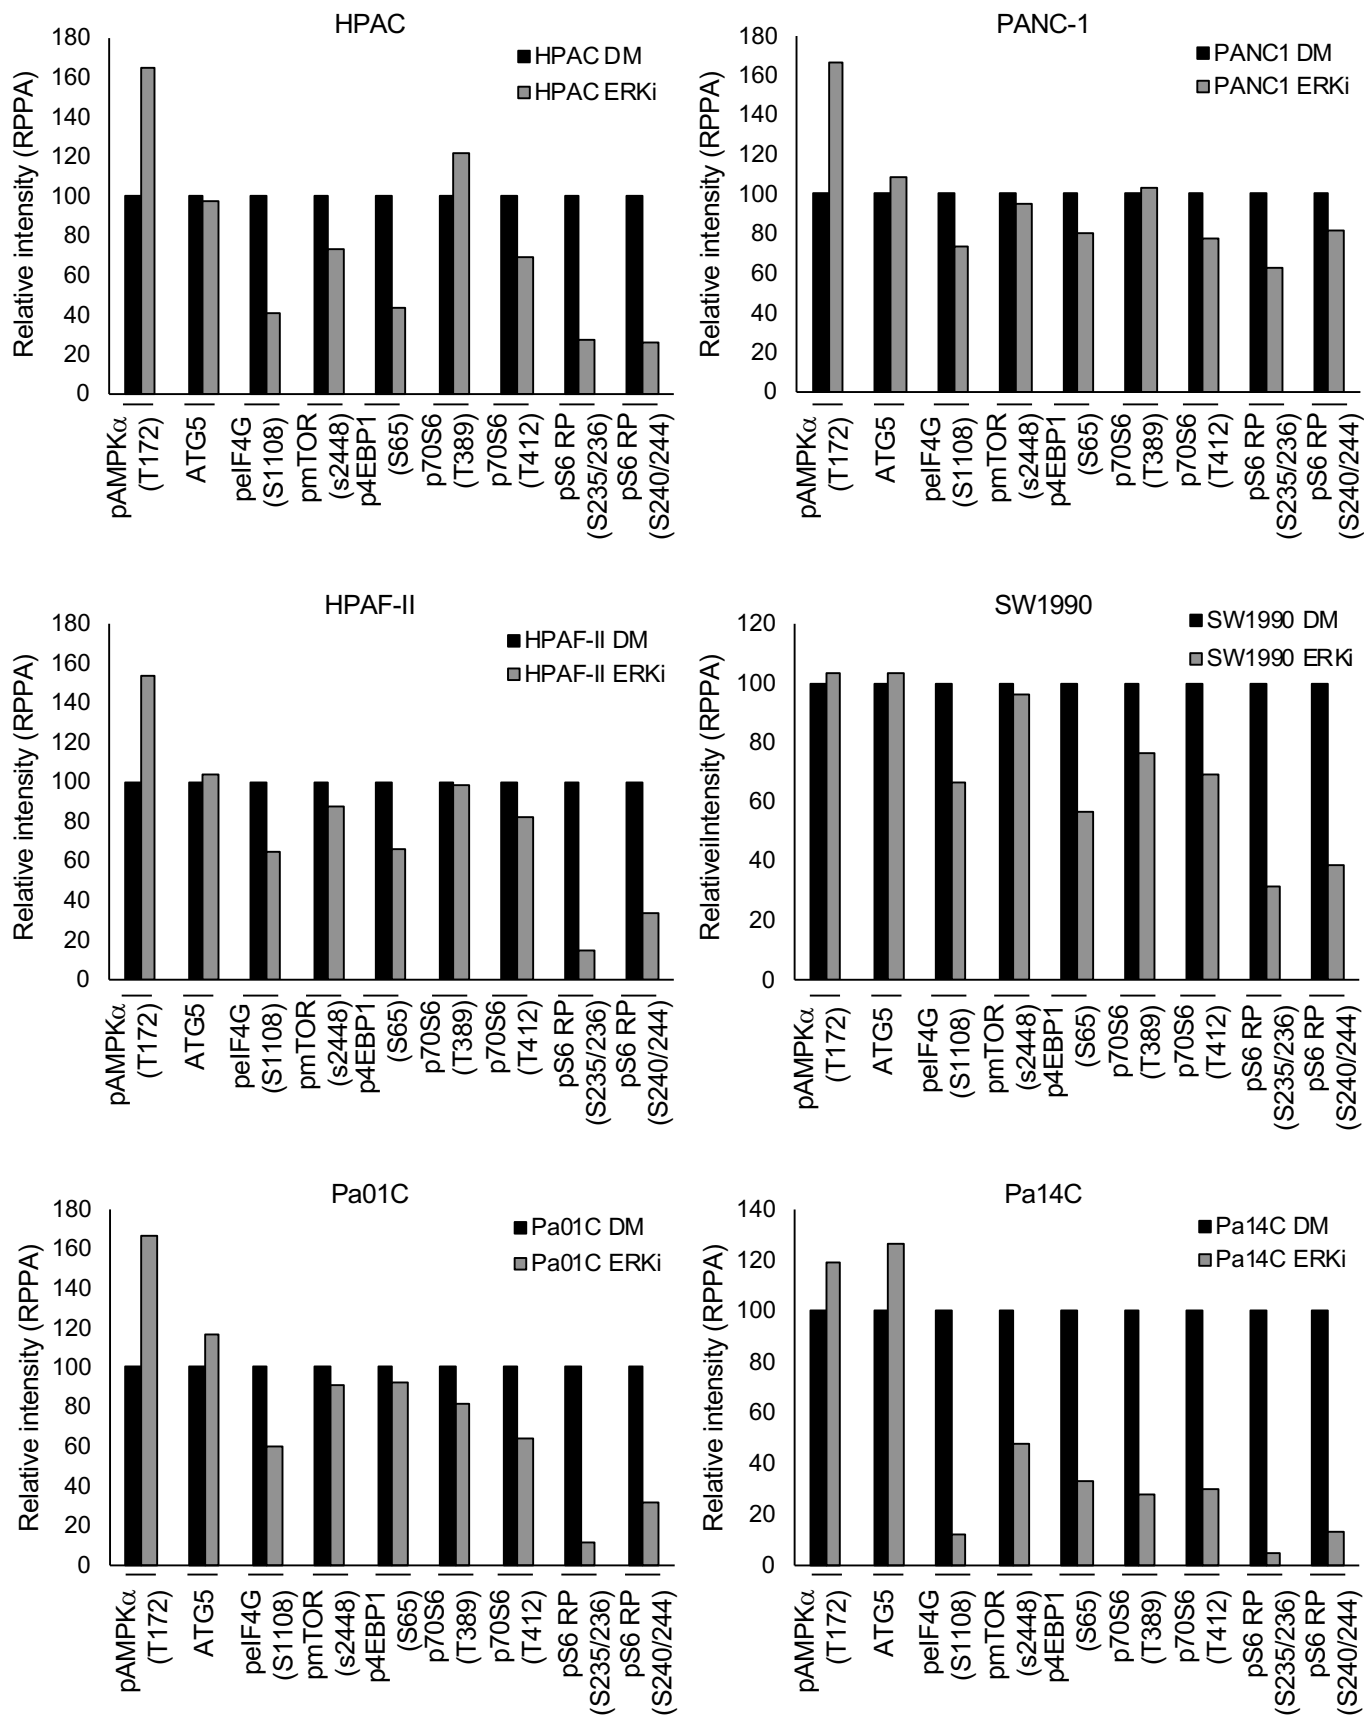

## Supplementary 2b continued

b, contin.

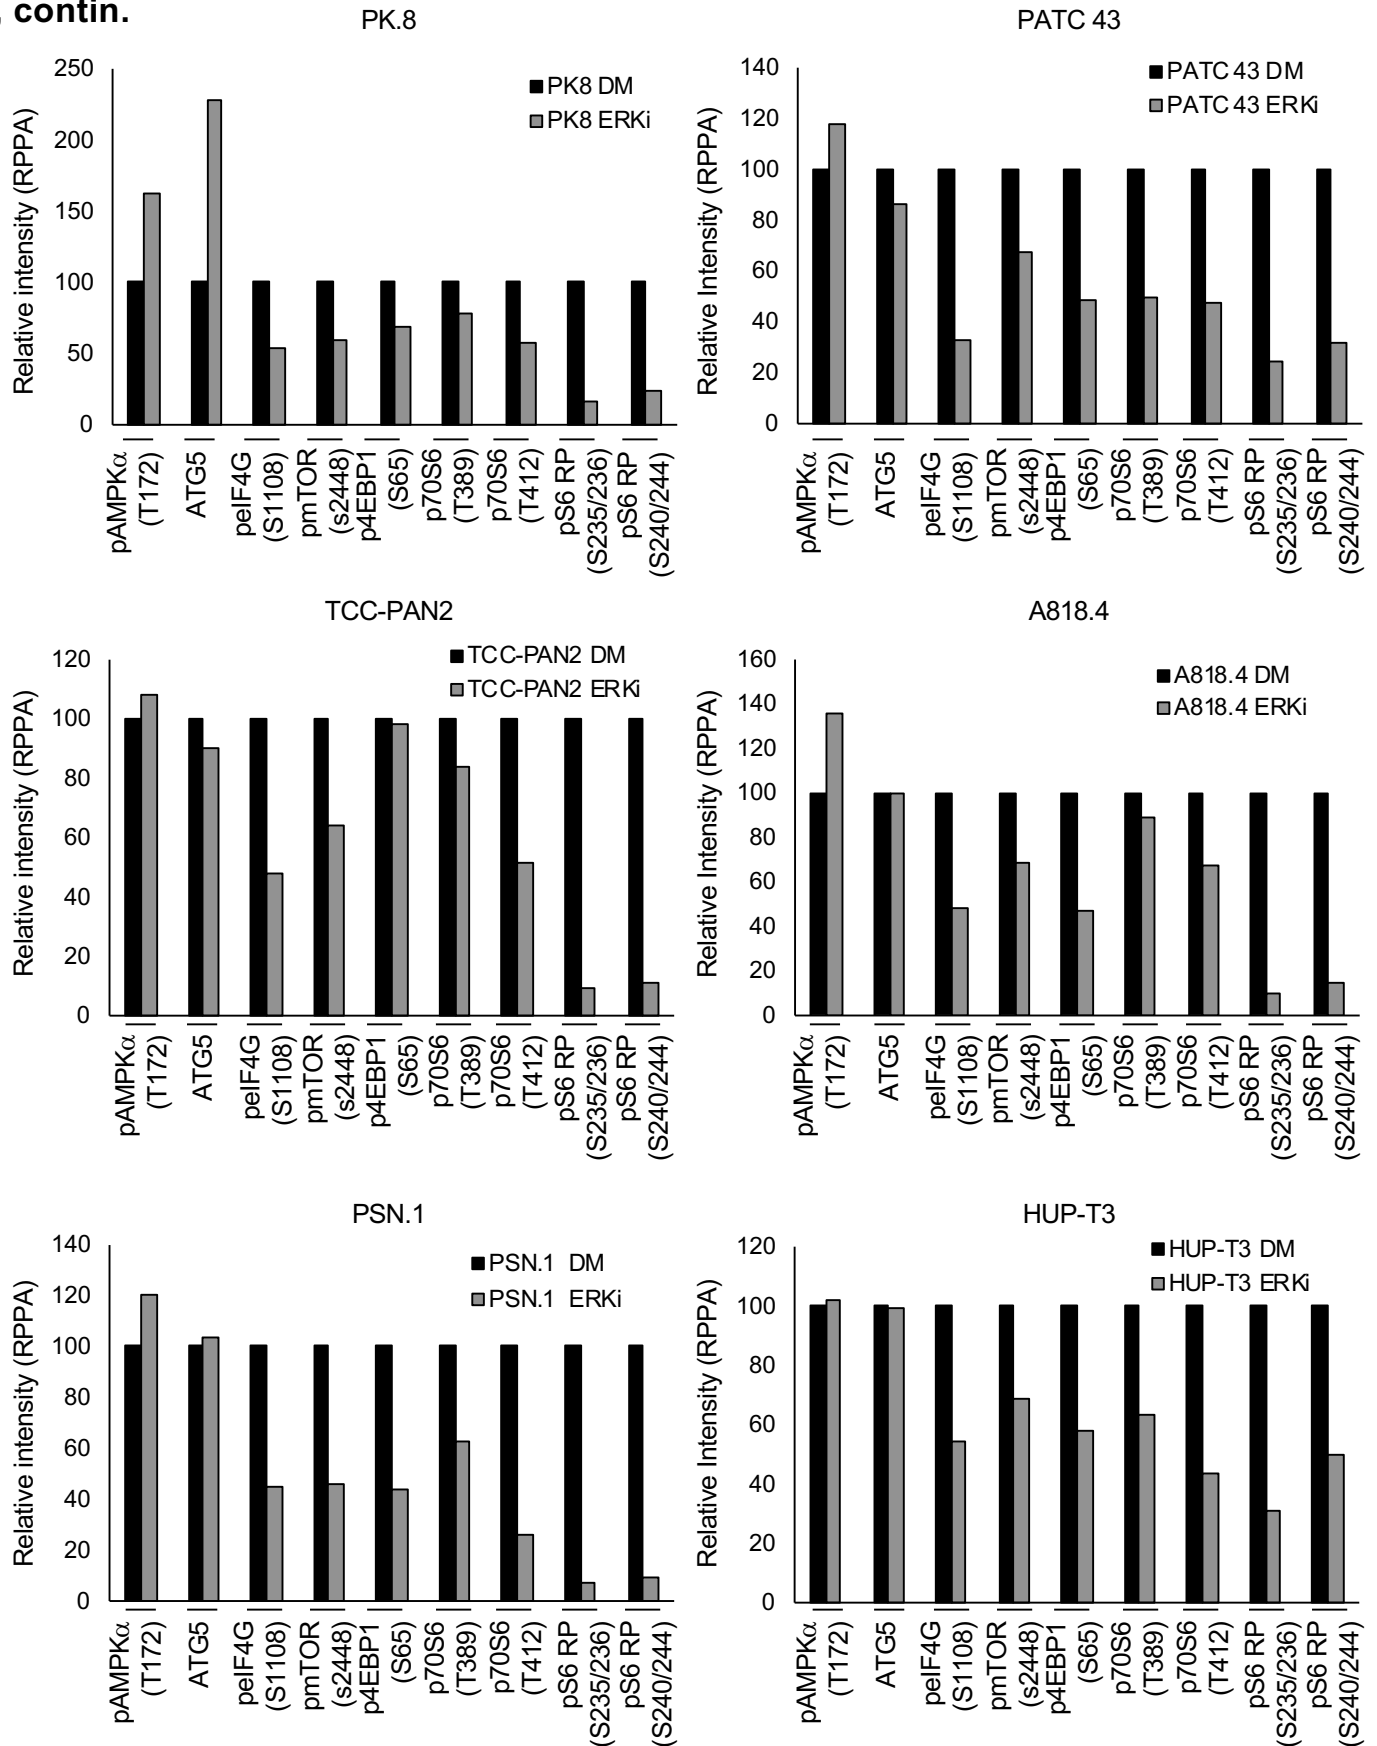



# Supplementary Figure 2c

c

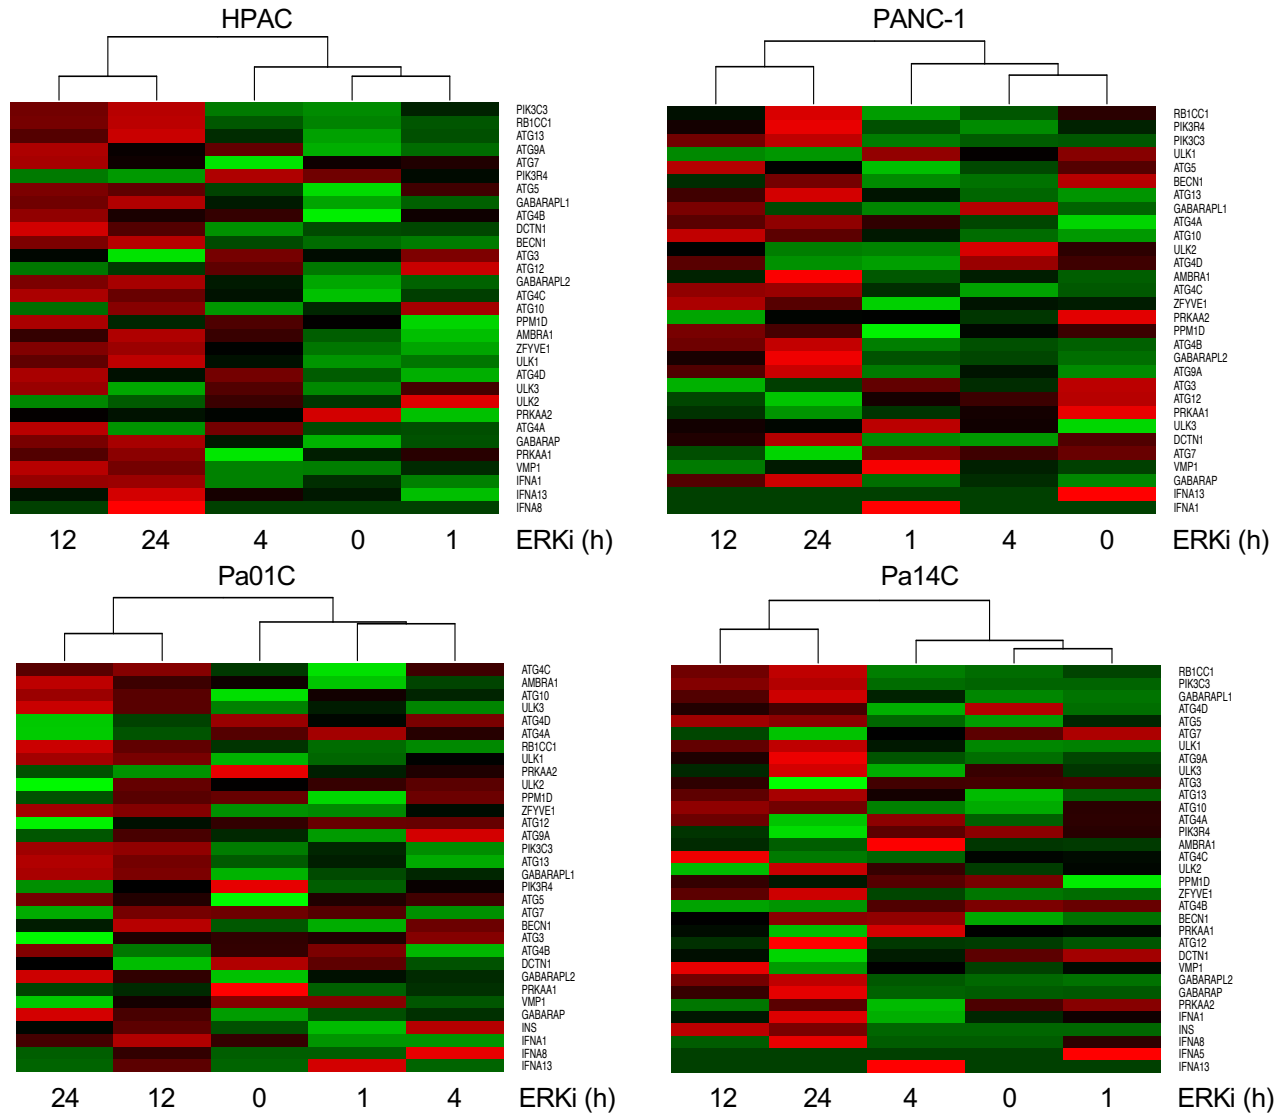

**Supplementary Figure 2 | ERK inhibition influences the transcription and activation of upstream mediators of autophagic signaling.** **a**, PDAC cell lines were treated with SCH772984 (ERKi, 1  $\mu$ M) or vehicle control (DMSO) for 1 or 24 h. Three biological replicates were prepared and Reverse-phase protein array (RPPA) analysis was performed. RPPA expression data for 1 h of SCH772984 treatment were standardized to no treatment samples and 24 h SCH772984 treatment samples were standardized to 24 h DMSO treated samples. Data were log<sub>2</sub> transformed and medians of three biological replicates are represented in the heat map. Red signal denotes higher expression relative to the median expression level within the group and blue signal denotes lower expression relative to the mean expression level within the group. Samples and proteins were arranged via hierarchical clustering. **b**, RPPA relative intensity data for each individual cell line represented in Fig. 3b. **c**, Heat maps from four of the seven cell lines analyzed in Fig. 3d of autophagy-related genes, duration of treatment with SCH772984 (ERKi) denoted at the bottom of each column. Expression levels shown are representative of log<sub>2</sub> values. Unsupervised hierarchical clustering analysis was performed to order columns in heat maps where red signal denotes higher expression relative to the mean expression level within the group and green signal denotes lower expression relative to the mean expression level within the group.

# Supplementary Figure 3a-b

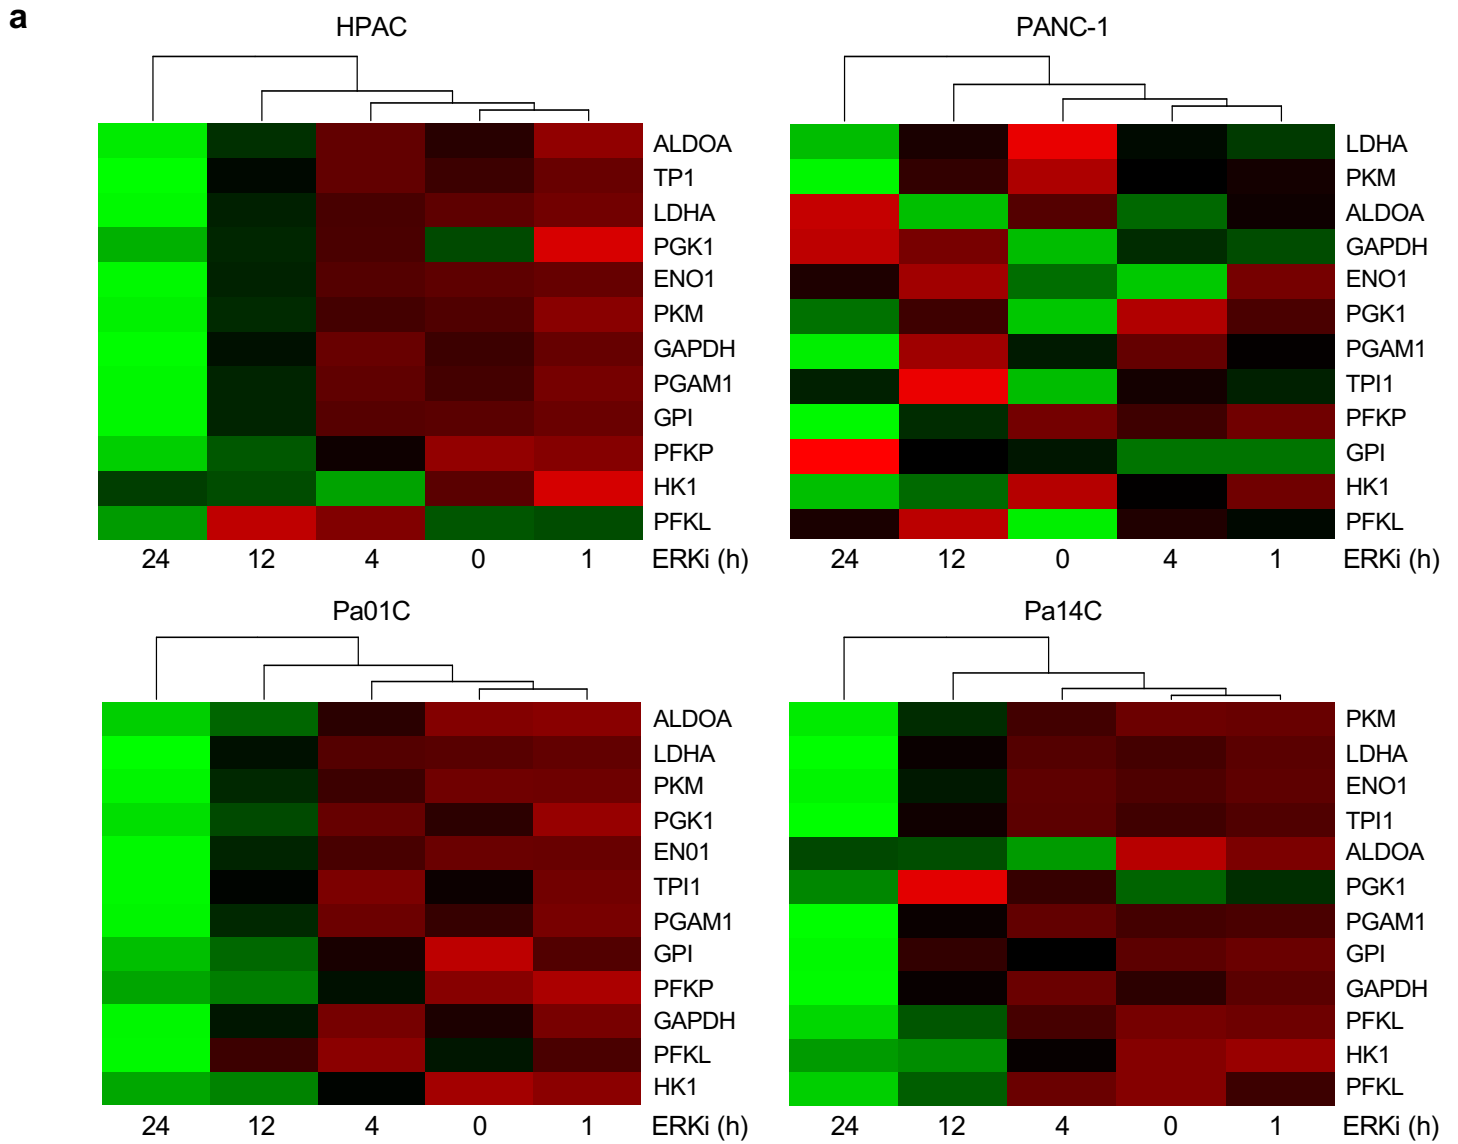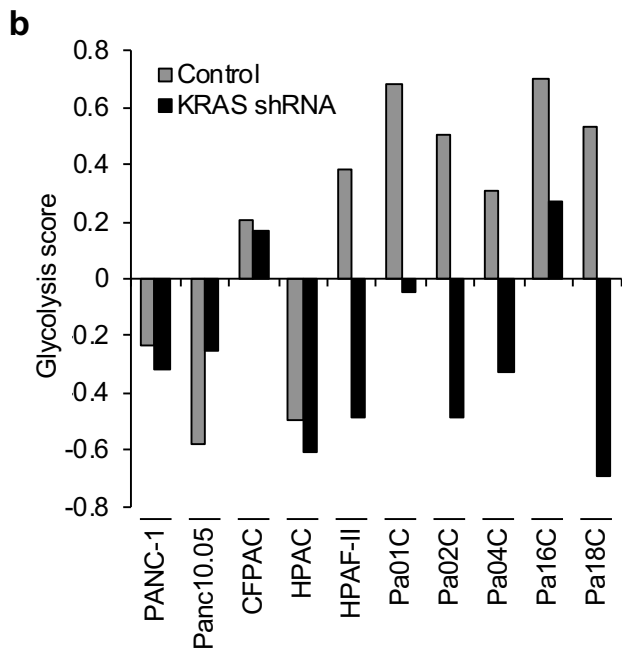

# Supplementary Figure 3c-f

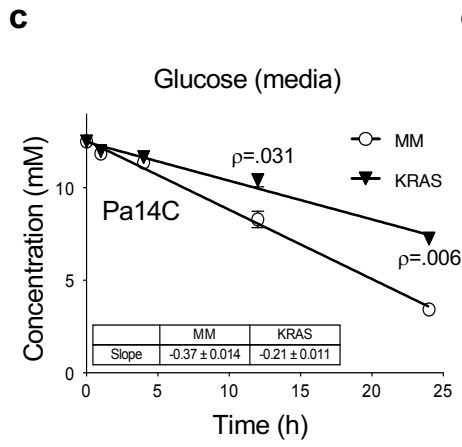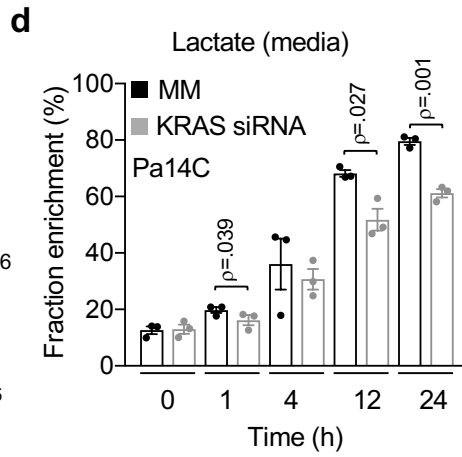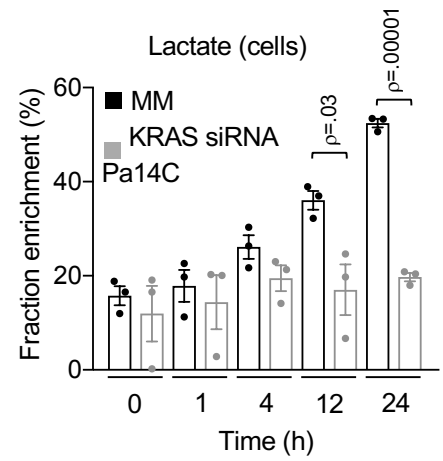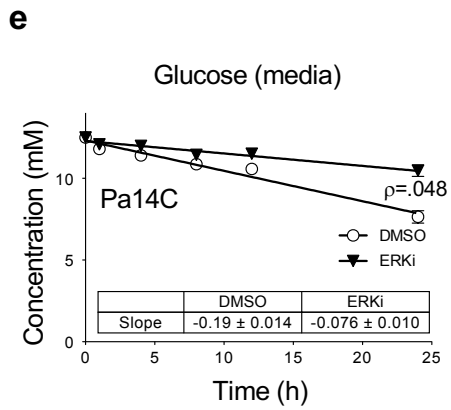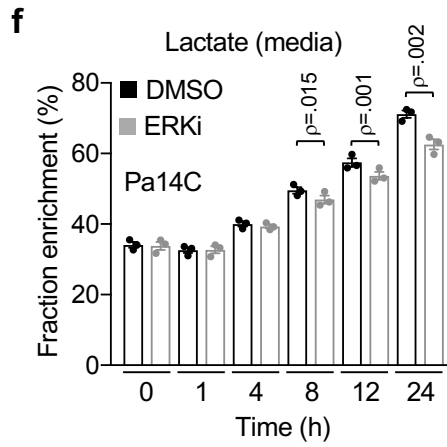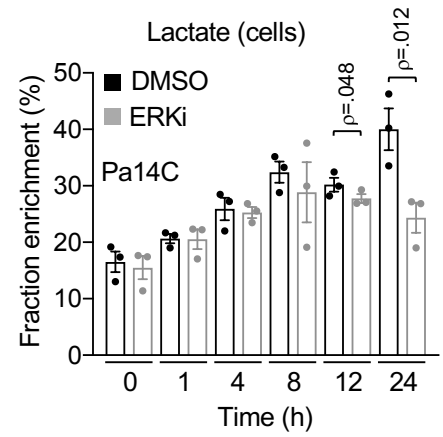

# Supplementary Figure 3g-h

**g**

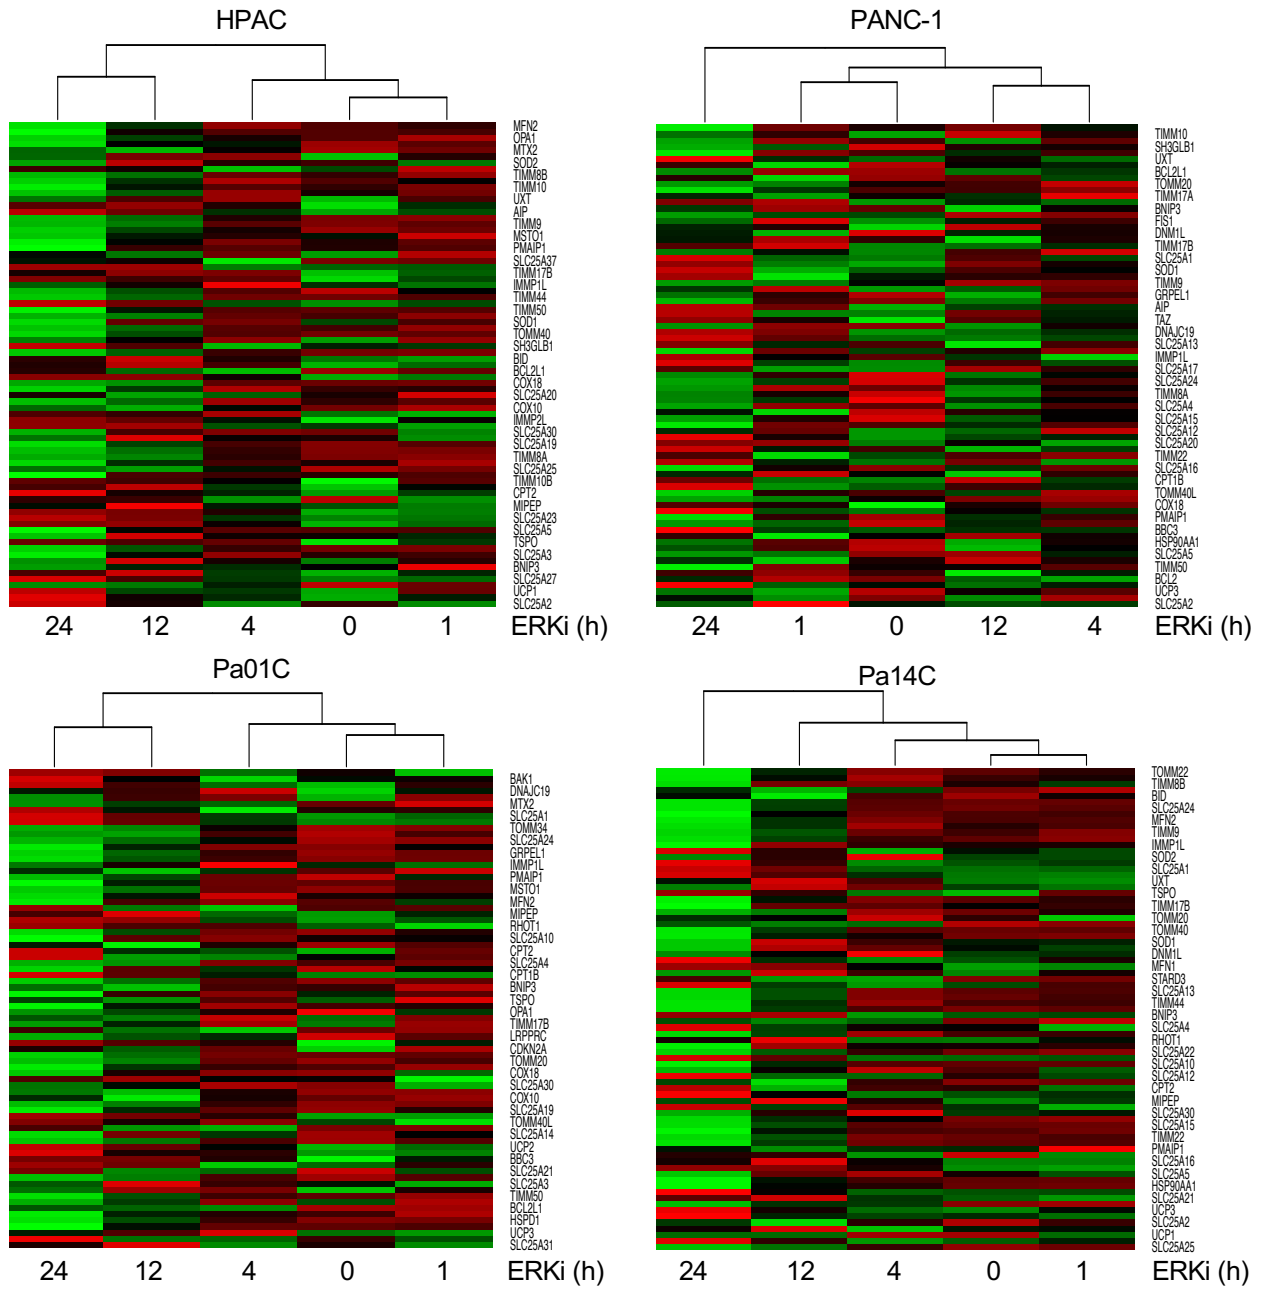

**h**

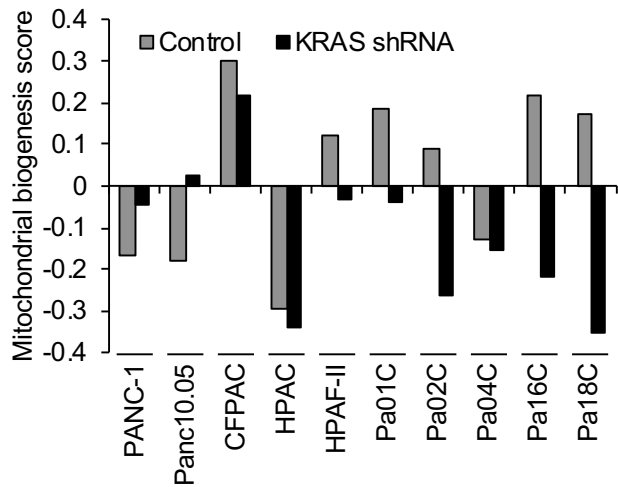

# Supplementary Figure 3i-l

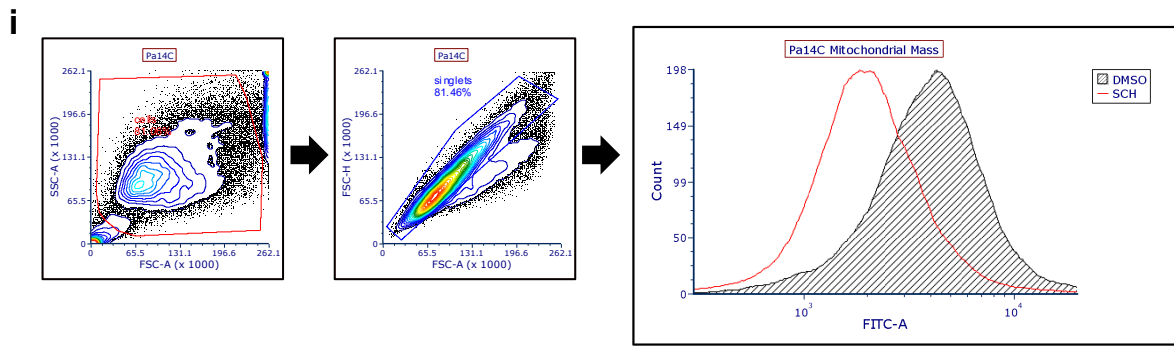

| Filename           | Median  | CV     |
|--------------------|---------|--------|
| Pa14C_DMSO_001.fcs | 3604.56 | 96.01  |
| Pa14C_SCH_002.fcs  | 1777.92 | 103.60 |

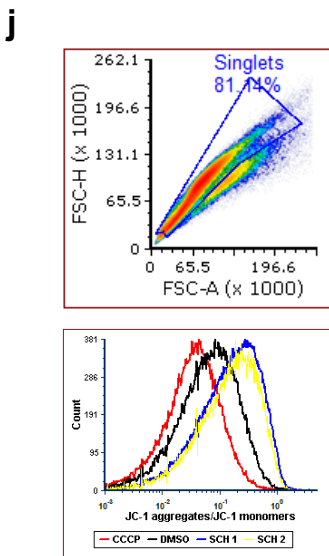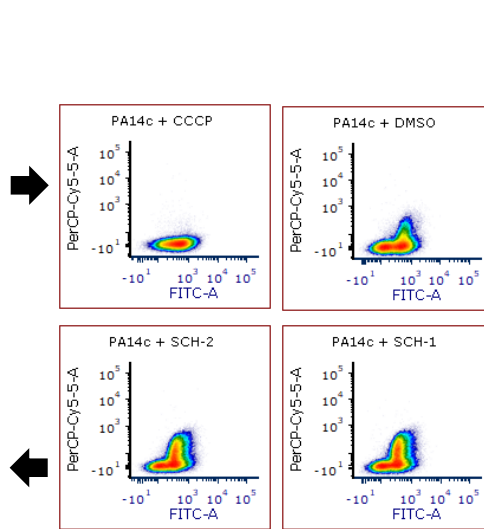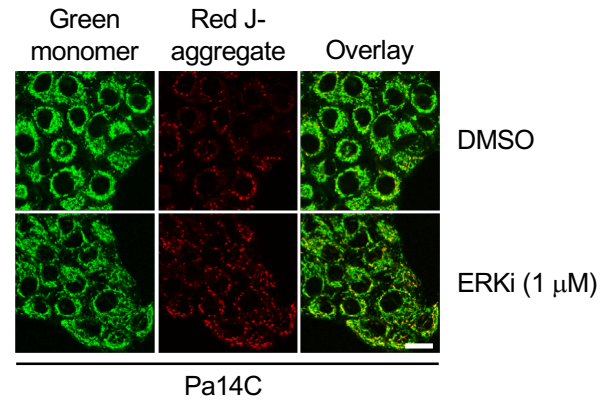

| Histogram # | Filename                                                      | # of Events | Median |
|-------------|---------------------------------------------------------------|-------------|--------|
| 1           | Pa14-1_DMSO + CCCP_001.fcs compensated Parameter Math applied | 93151       | 0.012  |
| 2           | Pa14-1_DMSO_002.fcs compensated Parameter Math applied        | 94998       | 0.026  |
| 3           | Pa14-1_SCH-1_003.fcs compensated Parameter Math applied       | 94262       | 0.105  |
| 4           | Pa14-1_SCH-2_004.fcs compensated Parameter Math applied       | 94322       | 0.105  |

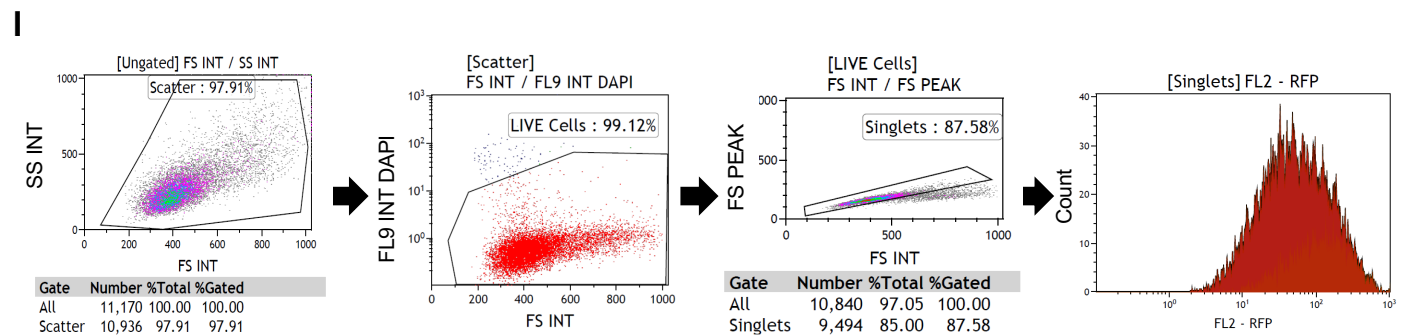

# Supplementary Figure 3m-n

**m**

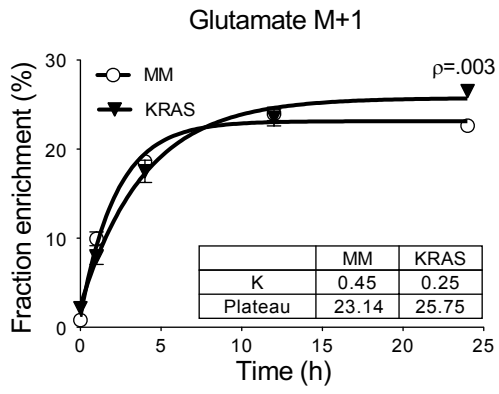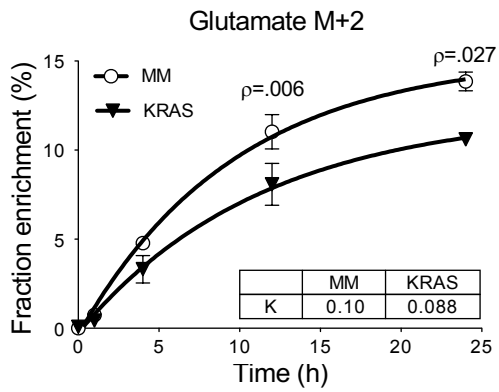

**n**

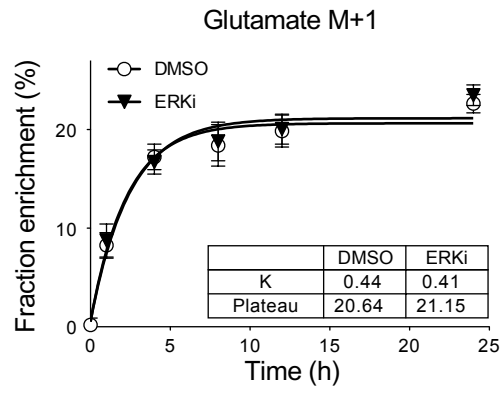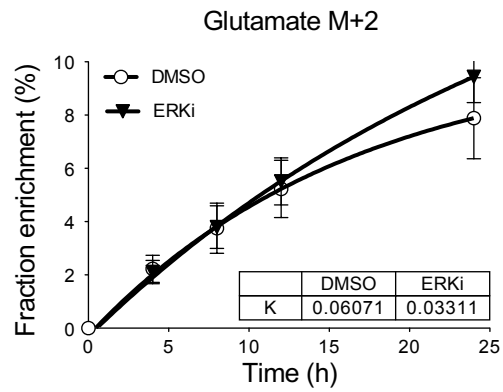

**Supplementary Figure 3 | Genetic silencing of KRAS and ERK inhibition reduces glycolytic flux and mitochondrial function in PDAC.** **a**, Heat maps from four of the seven cell lines analyzed in Fig. 3f of glycolysis-related genes, duration of treatment with SCH772984 (ERKi) denoted at the bottom of each column. Heat maps generated as in (Extended Data Fig. 3g). **b**, A panel of 10 PDAC cell lines were stably transduced with shRNA targeting *KRAS* (KRAS shRNA) or a nonspecific control (Control) for 72-120 h. Cells were collected and RNA-Seq analysis was performed. GSVA was performed in order to estimate the variation of different metabolic pathway activities upon KRAS KD in a non-supervised manner. Shown are GSVA scores for a panel of glycolysis-related genes. **c**, Pa14C cells were transiently transfected with siRNA targeting KRAS (KRAS) or a mismatch control (MM). Following 48 h, medium was changed to that containing 1,6-<sup>13</sup>C<sub>2</sub>-labeled glucose (12.5 mM) and metabolic flux analysis was performed over a 24 h time course. Shown is average glucose concentration in media across three independent experiments,  $\rho$  values from two-sided, unpaired t-test, error bars denote S.D. Slope is average across three independent experiments and error is S.D. **d**, Samples were prepared as described in (c), shown is average fraction enrichment of lactate in media and cells over time across three independent experiments,  $\rho$  values from two-sided, unpaired t-test, error bars denote S.E.M. **e**, Pa14C cells were treated with SCH772984 (ERKi, 1  $\mu$ M) or vehicle control (DMSO) for 24 h. Upon ERKi treatment, medium was changed to that containing 1,6-<sup>13</sup>C<sub>2</sub>-labeled glucose (12.5 mM) and metabolic flux analysis was performed over a 24 h time course. Shown is average glucose concentration in media across three independent experiments,  $\rho$  values from two-sided, unpaired t-test, error bars denote S.D. Slope is average across three independent experiments and error is S.D. **f**, Samples were prepared as described in (e), shown is average fraction enrichment of lactate in media and cells over time across three independent experiments,  $\rho$  values from two-sided, unpaired t-test, error bars denote S.E.M. **g**, Heat maps representing four of the seven cell lines



analyzed in Fig. 3g of mitochondrial biogenesis-related genes, duration of treatment with SCH772984 (ERKi) denoted at the bottom of each column. Heat maps generated as in Extended Data Fig. 3g. **h**, A panel of 10 PDAC cell lines were stably transduced with shRNA targeting KRAS (KRAS shRNA) or a nonspecific control (Control) for 72-120 h. Cells were collected and RNA-Seq analysis was performed. GSVA was performed in order to estimate the variation of different metabolic pathway activities upon KRAS KD in a non-supervised manner. Shown are GSVA scores for a panel of mitochondrial biogenesis-related genes. **i**, Gating strategy for mitochondrial mass experiments described in Fig. 4a. **j**, Gating strategy for quantification of relative mitochondrial potential in human PDAC cell lines via labeling with the JC-1 mitochondrial dye described in Fig. 4i-j. **k**, Representative images of Pa14C cells treated and labeled as described in Fig. 4i. Green: JC-1 monomers; Red: J-aggregates; Scale bar = 20  $\mu$ m, images are representative of three independent experiments. **l**, Gating strategy for quantification of relative mitochondrial potential in iKRAS cells using TMRE described in Extended Data Fig. 6a. **m**, Pa14C cells were transiently transfected with siRNA targeting *KRAS* (KRAS) or a MM control. Following 48 h, media was changed to that containing 1,6-<sup>13</sup>C-labeled glucose (12.5 mM) and metabolic flux analysis was performed over a 24 h time course. Shown is the average isotopomer distribution for glutamate over time across three independent experiments,  $\rho$  values from two-sided, unpaired t-test, error bars denote S.E.M.  $R^2$  values for curve fits are 0.9857 (MM, M+1), 0.9806 (K1, M+1), 0.9804 (MM, M+2), 0.9533 (K1, M+2)). **n**, Pa14C cells were treated with SCH772984 (ERKi) for a time course of 24 h. Upon the addition of SCH772984 (ERKi), media was changed to that containing 1,6-<sup>13</sup>C<sub>2</sub>-labeled glucose (12.5 mM) and metabolic flux analysis was performed over a 24 h time course. Shown is the average isotopologue distribution for glutamate in the media over time across three independent experiments, error bars denote S.E.M.  $R^2$  values for curve fits are 0.9189 (DMSO, M+1), 0.9129 (ERKi, M+1), 0.8336 (DMSO, M+2), 0.9235 (ERKi, M+2)).

# Supplementary Figure 4a-b

**a**

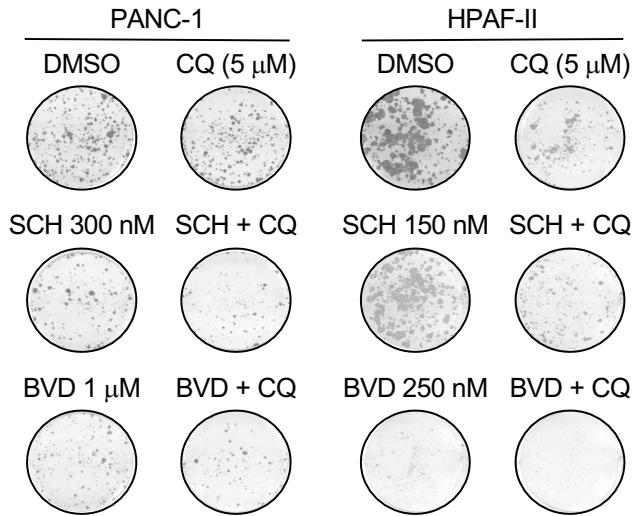

**b**

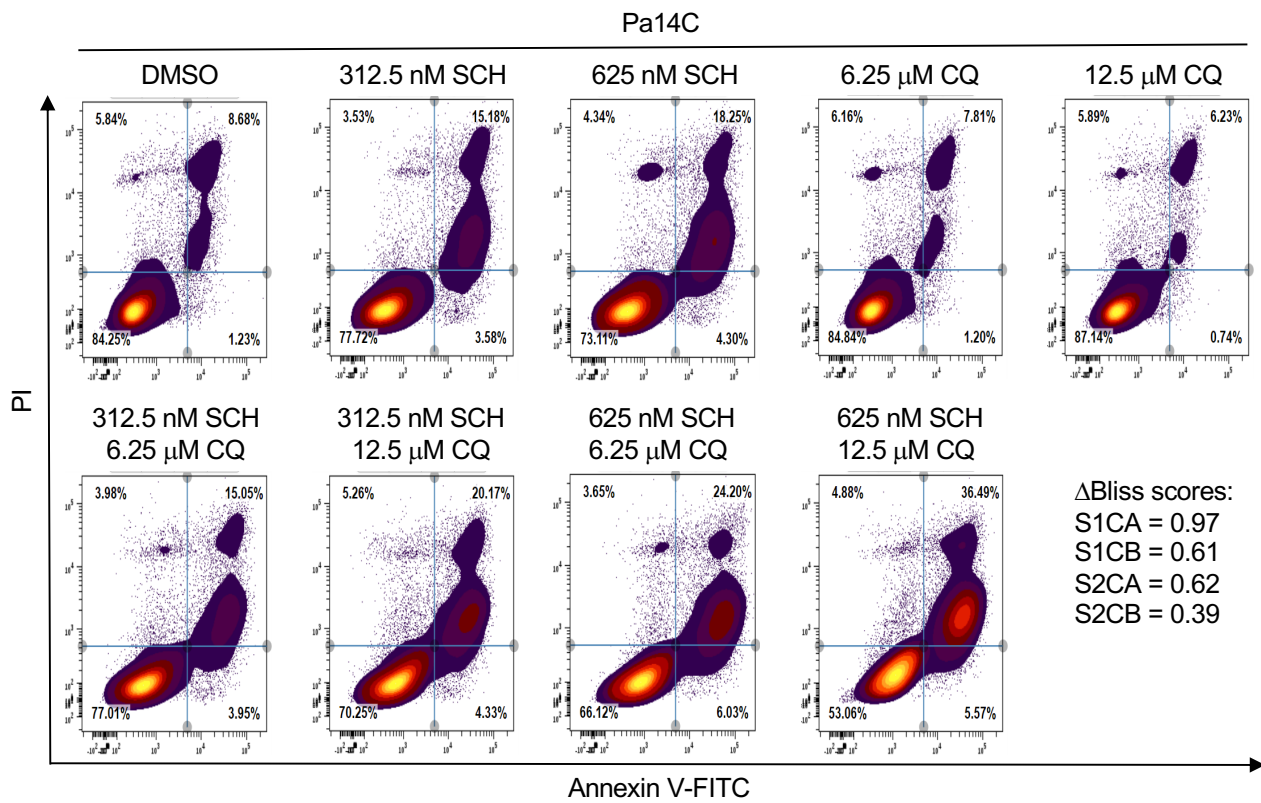

# Supplementary Figure 4c-e

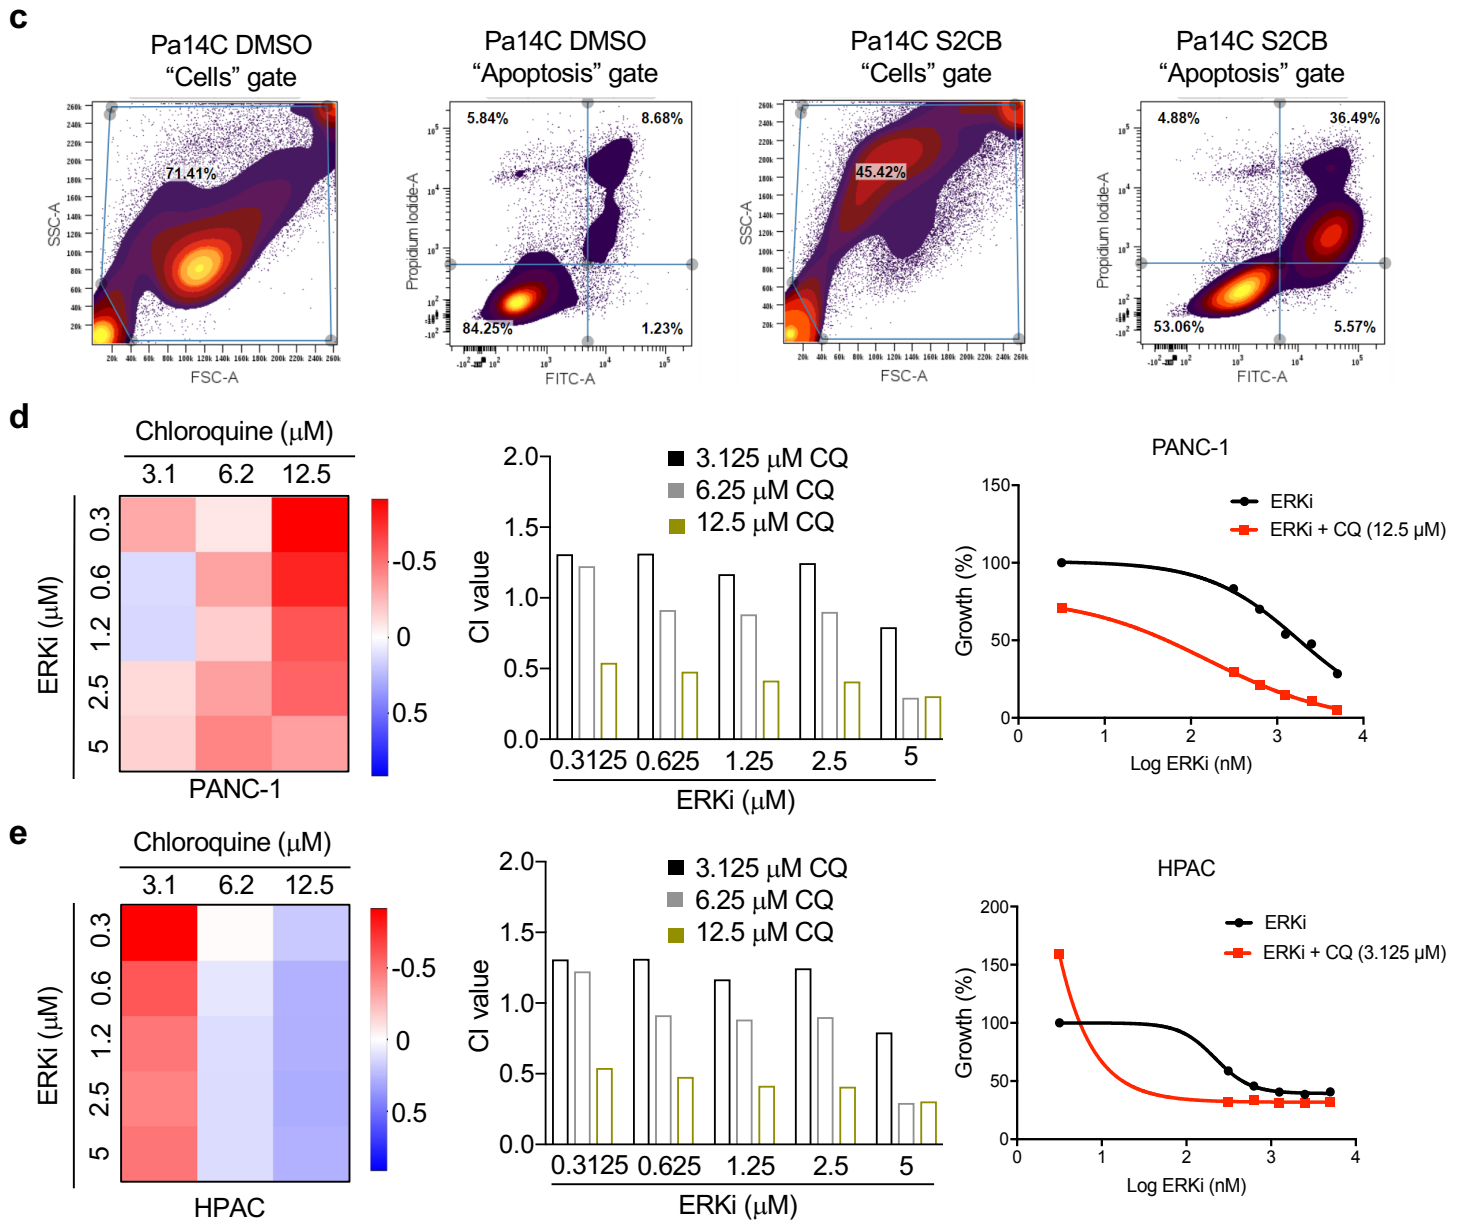

**Supplementary Figure 4 | ERK inhibition synergizes with the inhibition of autophagy to reduce proliferation in human PDAC cells.**

**a**, Representative images of colony formation assays in PANC-1 and HPAF-II cell lines quantified in Fig. 5b. Data are representative of two independent experiments. **b**, Representative contour plots from apoptosis experiment in Pa14C cell line described in Fig. 5d. **c**, Gating strategy for Annexin-V apoptosis experiments described in Fig. 5d and **(b)**. **d**, PANC-1 cells were grown as matrix embedded spheroids for 10 d in the presence of indicated concentrations of chloroquine (CQ) and SCH772984 (ERKi). Shown on the left is a heatmap representing BLISS independence scores, next are CI values calculated using Compusyn, and on the right are growth curves representing the most synergistic CQ concentration. **e**, HPAC cells were grown, treated, and analyzed as described in **(d)**.

## Supplementary Figure 5

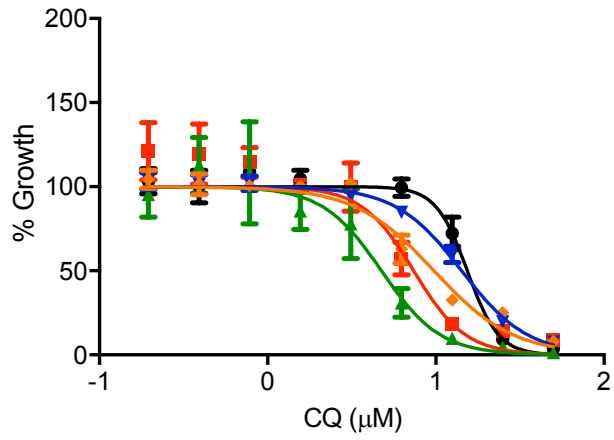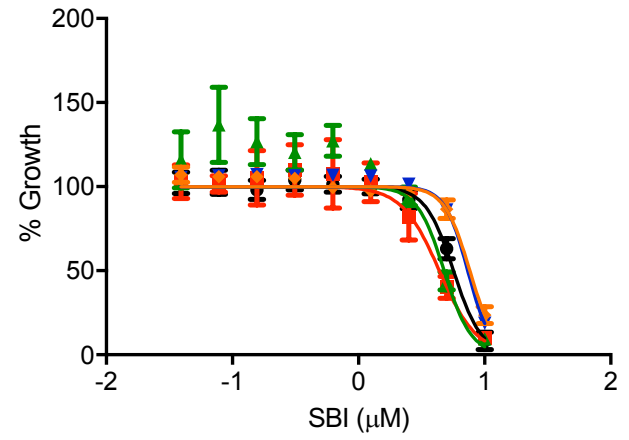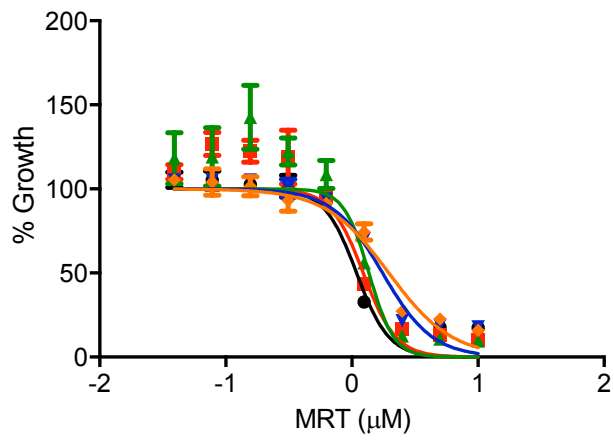

- MIA PaCa-2
- Pa01C
- ▲ Pa14C
- ▼ PANC-1
- ◆ HPAC

**Supplementary Figure 5| Comparison of the sensitivity of PDAC cell lines to different autophagy inhibitors.** Dose response curves for a panel of PDAC cell lines treated with a range of chloroquine (CQ), SBI-0206965 (SBI), or MRT68921 (MRT) concentrations for 5 d, proliferation was assessed by live cell counting. Normalized mean cell number, comparing treatment conditions to DMSO control, which was normalized to 100, is plotted and error bars denote S.D. of three technical replicates. Curves are representative of three independent experiments.

**Table S1. Gene sets used for Gene Set Variation Analyses**

| Gene      | Pathway   |
|-----------|-----------|
| RB1CC1    | Autophagy |
| GABARAPL2 | Autophagy |
| ATG5      | Autophagy |
| VMP1      | Autophagy |
| PIK3C3    | Autophagy |
| ULK2      | Autophagy |
| ATG4A     | Autophagy |
| AMBRA1    | Autophagy |
| IFNA8     | Autophagy |
| ATG4C     | Autophagy |
| BECN1     | Autophagy |
| ATG4D     | Autophagy |
| PRKAA1    | Autophagy |
| GABARAPL1 | Autophagy |
| ULK3      | Autophagy |
| ATG3      | Autophagy |
| ATG12     | Autophagy |
| IFNA5     | Autophagy |
| ATG10     | Autophagy |
| PRKAA2    | Autophagy |
| ZFYVE1    | Autophagy |
| ATG4B     | Autophagy |
| GABARAP   | Autophagy |
| PPM1D     | Autophagy |
| ATG13     | Autophagy |
| ULK1      | Autophagy |
| PIK3R4    | Autophagy |
| ATG7      | Autophagy |
| IFNA1     | Autophagy |
| ATG9A     | Autophagy |
| DCTN1     | Autophagy |
| IFNA13    | Autophagy |
| INS       | Autophagy |
| M6PR      | Lysosome  |
| LAMP2     | Lysosome  |
| IDS       | Lysosome  |
| SLC11A1   | Lysosome  |

|          |          |
|----------|----------|
| ATP6V0A1 | Lysosome |
| AGA      | Lysosome |
| CTNS     | Lysosome |
| ATP6V1H  | Lysosome |
| HEXB     | Lysosome |
| GALC     | Lysosome |
| CTSA     | Lysosome |
| AP3D1    | Lysosome |
| LAPTM4A  | Lysosome |
| CLTCL1   | Lysosome |
| AP3M2    | Lysosome |
| ATP6AP1  | Lysosome |
| AP1M1    | Lysosome |
| LAMP3    | Lysosome |
| AP4E1    | Lysosome |
| GNPTG    | Lysosome |
| MCOLN1   | Lysosome |
| GGA1     | Lysosome |
| AP1B1    | Lysosome |
| ARSA     | Lysosome |
| AP4S1    | Lysosome |
| LGMN     | Lysosome |
| CTSZ     | Lysosome |
| GLA      | Lysosome |
| ACP5     | Lysosome |
| CLN5     | Lysosome |
| PLA2G15  | Lysosome |
| NAGPA    | Lysosome |
| GGA2     | Lysosome |
| AP3B2    | Lysosome |
| CTSH     | Lysosome |
| LAPTM4B  | Lysosome |
| ASAH1    | Lysosome |
| MAN2B1   | Lysosome |
| DNASE2   | Lysosome |
| ATP6V0A4 | Lysosome |
| AP1S1    | Lysosome |
| LIPA     | Lysosome |
| NAGLU    | Lysosome |
| MANBA    | Lysosome |



|          |          |
|----------|----------|
| CTSC     | Lysosome |
| TCIRG1   | Lysosome |
| SLC11A2  | Lysosome |
| GNPTAB   | Lysosome |
| ARSB     | Lysosome |
| HYAL1    | Lysosome |
| ATP6V0B  | Lysosome |
| CTSD     | Lysosome |
| NPC2     | Lysosome |
| SLC17A5  | Lysosome |
| CLTA     | Lysosome |
| GGA3     | Lysosome |
| IDUA     | Lysosome |
| CD68     | Lysosome |
| AP1M2    | Lysosome |
| PPT1     | Lysosome |
| NAPSA    | Lysosome |
| AP3B1    | Lysosome |
| SORT1    | Lysosome |
| AP4B1    | Lysosome |
| ACP2     | Lysosome |
| CTSL     | Lysosome |
| CD63     | Lysosome |
| CD164    | Lysosome |
| GNS      | Lysosome |
| CTSV     | Lysosome |
| DNASE2B  | Lysosome |
| SCARB2   | Lysosome |
| GALNS    | Lysosome |
| ARSG     | Lysosome |
| CLTC     | Lysosome |
| NPC1     | Lysosome |
| CTSK     | Lysosome |
| SUMF1    | Lysosome |
| ATP6V0D2 | Lysosome |
| ABCB9    | Lysosome |
| AP1S3    | Lysosome |
| AP3S2    | Lysosome |
| ATP6V0D1 | Lysosome |
| LAPTM5   | Lysosome |

|          |            |
|----------|------------|
| CTSS     | Lysosome   |
| MFSD8    | Lysosome   |
| CTSB     | Lysosome   |
| HGSNAT   | Lysosome   |
| SMPD1    | Lysosome   |
| TPP1     | Lysosome   |
| AP1G1    | Lysosome   |
| GUSB     | Lysosome   |
| GLB1     | Lysosome   |
| GAA      | Lysosome   |
| CTSW     | Lysosome   |
| CTSF     | Lysosome   |
| CLTB     | Lysosome   |
| GBA      | Lysosome   |
| AP3S1    | Lysosome   |
| PSAPL1   | Lysosome   |
| FUCA1    | Lysosome   |
| SGSH     | Lysosome   |
| AP1S2    | Lysosome   |
| AP3M1    | Lysosome   |
| ATP6V0A2 | Lysosome   |
| ATP6V0C  | Lysosome   |
| LAMP1    | Lysosome   |
| CLN3     | Lysosome   |
| CTSE     | Lysosome   |
| GM2A     | Lysosome   |
| IGF2R    | Lysosome   |
| ENTPD4   | Lysosome   |
| PSAP     | Lysosome   |
| NAGA     | Lysosome   |
| NEU1     | Lysosome   |
| HEXA     | Lysosome   |
| AP4M1    | Lysosome   |
| PPT2     | Lysosome   |
| CTSO     | Lysosome   |
| PFKP     | Glycolysis |
| PKM      | Glycolysis |
| ENO1     | Glycolysis |
| PGK1     | Glycolysis |
| GPI      | Glycolysis |

|          |                          |
|----------|--------------------------|
| GAPDH    | Glycolysis               |
| TPI1     | Glycolysis               |
| LDHA     | Glycolysis               |
| PFKL     | Glycolysis               |
| ALDOA    | Glycolysis               |
| HK1      | Glycolysis               |
| PGAM1    | Glycolysis               |
| SLC25A13 | Mitochondrial Biogenesis |
| SLC25A5  | Mitochondrial Biogenesis |
| COX10    | Mitochondrial Biogenesis |
| BID      | Mitochondrial Biogenesis |
| TOMM34   | Mitochondrial Biogenesis |
| MIPEP    | Mitochondrial Biogenesis |
| BAK1     | Mitochondrial Biogenesis |
| SLC25A3  | Mitochondrial Biogenesis |
| HSP90AA1 | Mitochondrial Biogenesis |
| SLC25A24 | Mitochondrial Biogenesis |
| DNM1L    | Mitochondrial Biogenesis |
| SH3GLB1  | Mitochondrial Biogenesis |
| SLC25A1  | Mitochondrial Biogenesis |
| TOMM22   | Mitochondrial Biogenesis |
| TSPO     | Mitochondrial Biogenesis |
| SLC25A17 | Mitochondrial Biogenesis |
| TIMM9    | Mitochondrial Biogenesis |
| SLC25A14 | Mitochondrial Biogenesis |
| TAZ      | Mitochondrial Biogenesis |
| SLC25A15 | Mitochondrial Biogenesis |
| TIMM44   | Mitochondrial Biogenesis |
| TIMM50   | Mitochondrial Biogenesis |
| BBC3     | Mitochondrial Biogenesis |
| UCP1     | Mitochondrial Biogenesis |
| GRPEL1   | Mitochondrial Biogenesis |
| AIP      | Mitochondrial Biogenesis |
| SOD2     | Mitochondrial Biogenesis |
| SLC25A12 | Mitochondrial Biogenesis |
| MFN2     | Mitochondrial Biogenesis |
| SLC25A2  | Mitochondrial Biogenesis |
| SLC25A16 | Mitochondrial Biogenesis |
| SLC25A19 | Mitochondrial Biogenesis |
| MSTO1    | Mitochondrial Biogenesis |

|          |                          |
|----------|--------------------------|
| SLC25A23 | Mitochondrial Biogenesis |
| UXT      | Mitochondrial Biogenesis |
| TIMM17B  | Mitochondrial Biogenesis |
| RHOT1    | Mitochondrial Biogenesis |
| TIMM8A   | Mitochondrial Biogenesis |
| MTX2     | Mitochondrial Biogenesis |
| TOMM40   | Mitochondrial Biogenesis |
| STARD3   | Mitochondrial Biogenesis |
| TIMM10B  | Mitochondrial Biogenesis |
| TIMM17A  | Mitochondrial Biogenesis |
| TIMM10   | Mitochondrial Biogenesis |
| LRPPRC   | Mitochondrial Biogenesis |
| RHOT2    | Mitochondrial Biogenesis |
| PMAIP1   | Mitochondrial Biogenesis |
| SOD1     | Mitochondrial Biogenesis |
| HSPD1    | Mitochondrial Biogenesis |
| SLC25A37 | Mitochondrial Biogenesis |
| CDKN2A   | Mitochondrial Biogenesis |
| SLC25A25 | Mitochondrial Biogenesis |
| IMMP1L   | Mitochondrial Biogenesis |
| TIMM8B   | Mitochondrial Biogenesis |
| SLC25A31 | Mitochondrial Biogenesis |
| SLC25A4  | Mitochondrial Biogenesis |
| SLC25A27 | Mitochondrial Biogenesis |
| CPT2     | Mitochondrial Biogenesis |
| TOMM40L  | Mitochondrial Biogenesis |
| COX18    | Mitochondrial Biogenesis |
| MFN1     | Mitochondrial Biogenesis |
| BCL2L1   | Mitochondrial Biogenesis |
| BCL2     | Mitochondrial Biogenesis |
| TOMM20   | Mitochondrial Biogenesis |
| SLC25A30 | Mitochondrial Biogenesis |
| UCP3     | Mitochondrial Biogenesis |
| UCP2     | Mitochondrial Biogenesis |
| SFN      | Mitochondrial Biogenesis |
| BNIP3    | Mitochondrial Biogenesis |
| TIMM22   | Mitochondrial Biogenesis |
| SLC25A22 | Mitochondrial Biogenesis |
| SLC25A20 | Mitochondrial Biogenesis |
| SLC25A21 | Mitochondrial Biogenesis |

|          |                          |
|----------|--------------------------|
| SLC25A10 | Mitochondrial Biogenesis |
| IMMP2L   | Mitochondrial Biogenesis |
| OPA1     | Mitochondrial Biogenesis |
| CPT1B    | Mitochondrial Biogenesis |
| DNAJC19  | Mitochondrial Biogenesis |
| FIS1     | Mitochondrial Biogenesis |

---

**Table S2. Antibodies used for RPPA Analysis**

| Antibody                                   | Vendor                      | Catalogue number | Dilution |
|--------------------------------------------|-----------------------------|------------------|----------|
| 4E-BP1 (S65)                               | Cell Signaling Technologies | 9451             | 1:50     |
| 4E-BP1 (T37/46)                            | Cell Signaling Technologies | 9459             | 1:100    |
| 4E-BP1 (T70)                               | Cell Signaling Technologies | 9455             | 1:200    |
| Acetyl-CoA Carboxylase (S79)               | Cell Signaling Technologies | 3661             | 1:50     |
| Akt                                        | Cell Signaling Technologies | 9272             | 1:2000   |
| Akt (S473)                                 | Cell Signaling Technologies | 9271             | 1:100    |
| Akt (T308)                                 | Cell Signaling Technologies | 9275             | 1:100    |
| Akt1/PKB alpha (S473) (SK703)              | Upstate                     | 05-736           | 1:100    |
| Aldehyde Dehydrogenase 2 (ALDH2)           | Abcam                       | ab54828          | 1:100    |
| AMPKalpha (T172) (D79.5E)                  | Cell Signaling Technologies | 4188             | 1:2000   |
| AMPKBeta1 (S108)                           | Cell Signaling Technologies | 4181             | 1:50     |
| Androgen Rec (S650)                        | Abcam                       | ab47563          | 1:1000   |
| Androgen Rec (S81)                         | Millipore                   | 07-1375          | 1:1000   |
| A-Raf (S299)                               | Cell Signaling Technologies | 4431             | 1:50     |
| ASK1 (S83)                                 | Cell Signaling Technologies | 3761             | 1:50     |
| ATF-2 (T71)                                | Cell Signaling Technologies | 9221             | 1:100    |
| Atg5                                       | Cell Signaling Technologies | 2630             | 1:1000   |
| ATR (S428)                                 | Cell Signaling Technologies | 2853             | 1:50     |
| Aurora A (T288)/B (T232)/C (T198) (D13A11) | Cell Signaling Technologies | 2914             | 1:50     |
| Bad                                        | Cell Signaling Technologies | 9292             | 1:1000   |
| BAD (S112)                                 | Cell Signaling Technologies | 9291             | 1:200    |
| Bad (S136)                                 | Cell Signaling Technologies | 9295             | 1:50     |
| Bad (S155)                                 | Cell Signaling Technologies | 9297             | 1:100    |
| Bak                                        | Cell Signaling Technologies | 3814             | 1:100    |
| Bax                                        | Cell Signaling Technologies | 2772             | 1:200    |
| Bcl-2                                      | Cell Signaling Technologies | 2872             | 1:100    |
| Bcl-2 (S70) (5H2)                          | Cell Signaling Technologies | 2827             | 1:50     |
| Bcl-xL                                     | Cell Signaling Technologies | 2762             | 1:500    |
| Beclin 1                                   | Cell Signaling Technologies | 3738             | 1:100    |
| Biliverdin Reductase (BVR)                 | Stressgen                   | OSA-400          | 1:500    |
| BIM                                        | Cell Signaling Technologies | 2933             | 1:500    |
| BLVRB (biliverdin reductase B) (2F4)       | Abnova                      | H00000645-M09    | 1:50     |
| B-Raf (S445)                               | Cell Signaling Technologies | 2696             | 1:50     |
| c-Abl (T735)                               | Cell Signaling Technologies | 2864             | 1:50     |
| c-Abl (Y245)                               | Cell Signaling Technologies | 2861             | 1:100    |

|                                           |                             |           |        |
|-------------------------------------------|-----------------------------|-----------|--------|
| Caspase-3, cleaved (D175)                 | Cell Signaling Technologies | 9661      | 1:50   |
| Caspase-6, cleaved (D162)                 | Cell Signaling Technologies | 9761      | 1:50   |
| Caspase-7, cleaved (D198)                 | Cell Signaling Technologies | 9491      | 1:100  |
| Caspase-9, cleaved (D330)                 | Cell Signaling Technologies | 9501      | 1:50   |
| Catenin (beta) (S33/37/T41)               | Cell Signaling Technologies | 9561      | 1:100  |
| Catenin (beta) (T41/S45)                  | Cell Signaling Technologies | 9565      | 1:50   |
| Caveolin-1 (Y14) (EPR2288Y)               | Epitomics                   | 2267-1    | 1:200  |
| CDK2 (78B2)                               | Cell Signaling Technologies | 2546      | 1:200  |
| Chk-1 (S345)                              | Cell Signaling Technologies | 2341      | 1:50   |
| c-Kit (Y719)                              | Cell Signaling Technologies | 3391      | 1:100  |
| c-Myc                                     | Cell Signaling Technologies | 9402      | 1:100  |
| Cofilin (S3) (77G2)                       | Cell Signaling Technologies | 3313      | 1:500  |
| cPLA2 (S505)                              | Cell Signaling Technologies | 2831      | 1:1000 |
| c-Raf (S338) (56A6)                       | Cell Signaling Technologies | 9427      | 1:200  |
| CREB (S133)                               | Cell Signaling Technologies | 9191      | 1:100  |
| CrkII (Y221)                              | Cell Signaling Technologies | 3491      | 1:100  |
| Cu/Zn Superoxide Dismutase (SOD)          | Stressgen                   | SOD-100   | 1:750  |
| Cytochrome C oxidoreductase               | MitoSciences                | MS408     | 1:250  |
| DEPTOR                                    | Millipore                   | 09-463    | 1:4000 |
| E-Cadherin                                | Cell Signaling Technologies | 4065      | 1:500  |
| EGFR (Y1068)                              | Cell Signaling Technologies | 2234      | 1:50   |
| EGFR (Y1148)                              | BioSource                   | 44-792    | 1:100  |
| EGFR (Y1173)                              | BioSource                   | 44-794    | 1:100  |
| eIF2alpha (S51) (119A11)                  | Cell Signaling Technologies | 3597      | 1:500  |
| eIF4E (S209)                              | Cell Signaling Technologies | 9741      | 1:50   |
| eIF4G (S1108)                             | Cell Signaling Technologies | 2441      | 1:1000 |
| Elk-1 (S383)                              | Cell Signaling Technologies | 9181      | 1:100  |
| eNOS (S1177)                              | Cell Signaling Technologies | 9571      | 1:50   |
| eNOS/NOS III (S116)                       | Upstate                     | 07-357    | 1:500  |
| ErbB2/HER2 (Y1248)                        | Imgenex                     | IMG-90189 | 1:500  |
| ErbB3/HER3 (Y1289) (21D3)                 | Cell Signaling Technologies | 4791      | 1:200  |
| ERCC1 (4F9)                               | Origene                     | UM500008  | 1:50   |
| ERK (T202/Y204)                           | Cell Signaling Technologies | 9101      | 1:1000 |
| ERK 1/2                                   | Cell Signaling Technologies | 9102      | 1:200  |
| Etk (Y40)                                 | Cell Signaling Technologies | 3211      | 1:2000 |
| Ezrin (T567)/Radixin (T564)/Moesin (T558) | Cell Signaling Technologies | 3141      | 1:100  |
| Ezrin (Y353)                              | Cell Signaling Technologies | 3144      | 1:100  |
| FADD (S194)                               | Cell Signaling Technologies | 2781      | 1:100  |
| FAK (Y397) (18)                           | BD                          | 611806    | 1:50   |

|                                        |                             |          |        |
|----------------------------------------|-----------------------------|----------|--------|
| FAK (Y576/577)                         | Cell Signaling Technologies | 3281     | 1:200  |
| FKHR/FOX01 S256                        | Cell Signaling Technologies | 9461     | 1:100  |
| FKHR-FOX01 T24/FKHRL1-FOX03a T32       | Cell Signaling Technologies | 9464     | 1:200  |
| FKHRL1/FOX03 (S253)                    | Upstate                     | 06-953   | 1:1000 |
| FOXO1 (T600)                           | Cell Signaling Technologies | 14655    | 1:100  |
| GSK-3a/B (S21/9)                       | Cell Signaling Technologies | 9331     | 1:100  |
| GSK-3alpha (S21) (46H12)               | Cell Signaling Technologies | 9337     | 1:100  |
| GSK-3alpha (Y279)/beta (Y216)          | Biosource                   | 44-604   | 1:500  |
| GSK-3beta (S9)                         | Cell Signaling Technologies | 9336     | 1:100  |
| Heme-Oxygenase-1                       | Stressgen                   | SPA-894  | 1:500  |
| Histone H3 (S10) Mitosis Marker        | Upstate                     | 06-570   | 1:200  |
| Histone H3 (S28)                       | Upstate                     | 07-145   | 1:1000 |
| HSP90a (T5/7)                          | Cell Signaling Technologies | 3488     | 1:100  |
| IGF-1 Rec (Y1131)/Insulin Rec (Y1146)  | Cell Signaling Technologies | 3021     | 1:500  |
| IGF-1R (Y1135/36)/IR (Y1150/51) (19H7) | Cell Signaling Technologies | 3024     | 1:500  |
| IkappaB-alpha (S32/36) (39A1431)       | Cell Signaling Technologies | 551818   | 1:50   |
| IRS-1 (S612)                           | Cell Signaling Technologies | 2386     | 1:200  |
| LAMP-2 (H4HB4)                         | SantaCruz                   | sc-18822 | 1:2000 |
| LC3B                                   | Cell Signaling Technologies | 2775     | 1:100  |
| Lck (Y505)                             | Biosource                   | 44-850   | 1:50   |
| LDHA                                   | Cell Signaling Technologies | 2012     | 1:100  |
| LIMK1 (T508)/LIMK2 (T505)              | Cell Signaling Technologies | 3841     | 1:100  |
| LKB1 (S334)                            | Cell Signaling Technologies | 3055     | 1:50   |
| LKB1 (S428)                            | Cell Signaling Technologies | 3051     | 1:100  |
| MARCKS (S152/156)                      | Cell Signaling Technologies | 2741     | 1:200  |
| MDM2 (S166)                            | Cell Signaling Technologies | 3521     | 1:100  |
| MEK1 (S298)                            | Cell Signaling Technologies | 9128     | 1:2000 |
| MEK1/2 (S217/221)                      | Cell Signaling Technologies | 9121     | 1:500  |
| Met (Y1234/1235)                       | Cell Signaling Technologies | 3126     | 1:200  |
| Mn Superoxide Dismutase (SOD)          | Assay Design                | SOD-110  | 1:500  |
| MSK1 (S360)                            | Cell Signaling Technologies | 9594     | 1:50   |
| Mst1 (T183)/Mst2 (T180)                | Cell Signaling Technologies | 3681     | 1:50   |
| mTOR (S2448)                           | Cell Signaling Technologies | 2971     | 1:100  |
| NF-kappaB p65 (S536)                   | Cell Signaling Technologies | 3031     | 1:100  |
| p27 (T187)                             | Zymed                       | 71-7700  | 1:200  |
| p38 MAPK (T180/Y182)                   | Cell Signaling Technologies | 9211     | 1:100  |
| p53 (S15)                              | Cell Signaling Technologies | 9284     | 1:1000 |
| p62/SQSTM1 (D5E2)                      | Cell Signaling Technologies | 8025     | 1:50   |



|                                       |                             |         |        |
|---------------------------------------|-----------------------------|---------|--------|
| p70 S6 Kinase (S371)                  | Cell Signaling Technologies | 9208    | 1:50   |
| p70 S6 Kinase (T389)                  | Cell Signaling Technologies | 9205    | 1:100  |
| p70 S6 Kinase (T412)                  | Upstate                     | 07-018  | 1:500  |
| p90RSK (S380)                         | Cell Signaling Technologies | 9341    | 1:200  |
| PAK1 (T423)/PAK2 (T402)               | Cell Signaling Technologies | 2601    | 1:100  |
| PAK2 (S20)                            | Cell Signaling Technologies | 2607    | 1:100  |
| PARP, cleaved (D214)                  | Cell Signaling Technologies | 9541    | 1:100  |
| PDK1 (S241)                           | Cell Signaling Technologies | 3061    | 1:200  |
| PI3-Kinase                            | BD                          | 610045  | 1:100  |
| PI3-Kinase p110gamma                  | Cell Signaling Technologies | 4252    | 1:100  |
| PKA C (T197)                          | Cell Signaling Technologies | 4781    | 1:200  |
| PKC alpha (S657)                      | Upstate                     | 06-822  | 1:1000 |
| PKC delta (T505)                      | Cell Signaling Technologies | 9374    | 1:50   |
| PKC theta (T538)                      | Cell Signaling Technologies | 9377    | 1:100  |
| PKC zeta/lambda (T410/403)            | Cell Signaling Technologies | 9378    | 1:50   |
| PLC-gamma-1                           | Cell Signaling Technologies | 2822    | 1:500  |
| PLK1                                  | Cell Signaling Technologies | 4535    | 1:100  |
| PLK1 (T210)                           | BD                          | 558400  | 1:200  |
| PRAS40 (T246)                         | BioSource                   | 44-1100 | 1:1000 |
| Proteasome 20S C2                     | Abcam                       | ab3325  | 1:500  |
| PTEN                                  | Cell Signaling Technologies | 9552    | 1:50   |
| PTEN (S380)                           | Cell Signaling Technologies | 9551    | 1:500  |
| PUMA                                  | Cell Signaling Technologies | 4976    | 1:200  |
| Pyk2 (Y402)                           | Cell Signaling Technologies | 3291    | 1:200  |
| Raf (S259)                            | Cell Signaling Technologies | 9421    | 1:100  |
| Ras (RAS10)                           | Millipore                   | 05-516  | 1:200  |
| Ras-GRF1 (S916)                       | Cell Signaling Technologies | 3321    | 1:50   |
| Rb (S780)                             | Cell Signaling Technologies | 3590    | 1:2000 |
| Ret (Y905)                            | Cell Signaling Technologies | 3221    | 1:100  |
| Ron (Y1353)                           | Epitomics                   | 5176-1  | 1:1000 |
| RSK3 (T356/S360)                      | Cell Signaling Technologies | 9348    | 1:500  |
| S6 Ribosomal Protein (S235/236) (2F9) | Cell Signaling Technologies | 4856    | 1:200  |
| S6 Ribosomal Protein (S240/244)       | Cell Signaling Technologies | 2215    | 1:1000 |
| SAPK/JNK (T183/Y185)                  | Cell Signaling Technologies | 9251    | 1:100  |
| SEK1/MKK4 (S80)                       | Cell Signaling Technologies | 9155    | 1:50   |
| Shc (Y317)                            | Upstate                     | 07-206  | 1:200  |
| Smad2 (S245/250/255)                  | Cell Signaling Technologies | 3104    | 1:100  |
| Smad2 (S465/467)                      | Cell Signaling Technologies | 3101    | 1:200  |
| Src (Y527)                            | Cell Signaling Technologies | 2105    | 1:200  |

|                                 |                             |          |        |
|---------------------------------|-----------------------------|----------|--------|
| Src Family (Y416)               | Cell Signaling Technologies | 2101     | 1:100  |
| ST6GALNAC5                      | Aviva                       | ARP49986 | 1:50   |
| Thioredoxin Reductase 1 (TrxR1) | SantaCruz                   | sc28321  | 1:50   |
| Vav3 (Y173)                     | Biosource                   | 44-488   | 1:1000 |
| Vimentin                        | Cell Signaling Technologies | 3295     | 1:500  |
| YAP (S127) (D9W2I)              | Cell Signaling Technologies | 13008    | 1:100  |

---

**Table S3. Antibodies with significant changes in signal at 1 hour**

| <b>Antibody</b>                  | <b>p-value (FDR corrected)</b> |
|----------------------------------|--------------------------------|
| p90RSK.S380                      | 0.010811942                    |
| RSK3.T356.360                    | 0.010811942                    |
| MDM2.S166                        | 0.010811942                    |
| p70S6.Kinase.T412                | 0.010811942                    |
| 4EBP1.T70                        | 0.010811942                    |
| Akt1.PKB.alpha.S473              | 0.010811942                    |
| FKHR.FOX01.T24.FKHRL1.FOX03a.T32 | 0.010811942                    |
| cPLA2.S505                       | 0.012613932                    |
| MEK.1.2.S217.221                 | 0.012613932                    |
| BAD.S112                         | 0.012613932                    |
| ATF.2.T71                        | 0.012613932                    |
| HSP90a.T5.7                      | 0.012613932                    |
| ERK.1.2.T202.Y204                | 0.02328726                     |
| p70S6.Kinase.T389                | 0.023651123                    |
| eIF4E.S209                       | 0.023651123                    |
| AKT.S473                         | 0.023651123                    |
| AMPKalpha.T172                   | 0.042046441                    |
| ErbB3.HER3.Y1289                 | 0.042046441                    |

PDAC cell lines were treated with vehicle (DMSO) or SCH772984 (ERKi, 1  $\mu$ M) for 1 or 24 h. Three independent experiments were prepared and reverse-phase protein array (RPPA) analysis was performed. RPPA expression data for 1 h of SCH772984 treatment were standardized to no treatment samples. Data were log<sub>2</sub> transformed and medians of three independent experiments are represented in the heat map. Only proteins with statistically significant ( $p < 0.05$ , FDR corrected, Wilcoxon test) changes at 1 h are shown.

**Table S4. Antibodies with significant changes in signal at 24 hours**

| <b>Antibody</b>                | <b>p-value (FDR corrected)</b> |
|--------------------------------|--------------------------------|
| p90RSK.S380                    | 0.004730225                    |
| RSK3.T356.360                  | 0.004730225                    |
| MDM2.S166                      | 0.004730225                    |
| p70S6.Kinase.T412              | 0.004730225                    |
| cPLA2.S505                     | 0.004730225                    |
| ERK.1.2.T202.Y204              | 0.004730225                    |
| AMPKalpha.T172                 | 0.004730225                    |
| Cofilin.S3                     | 0.004730225                    |
| mTOR.S2448                     | 0.004730225                    |
| 4EBP1.S65                      | 0.004730225                    |
| Raf.S259                       | 0.004730225                    |
| c.Myc                          | 0.004730225                    |
| CREB.S133                      | 0.004730225                    |
| PLK1                           | 0.004730225                    |
| SAPK.JNK.T183.185              | 0.004730225                    |
| eNOS.NOS.III.S116              | 0.004730225                    |
| S6.Ribosomal.Protein.S240.244  | 0.004730225                    |
| Ron.Y1353                      | 0.004730225                    |
| ERK.1.2.TOTAL                  | 0.004730225                    |
| GSK.3a.B.S21.9                 | 0.004730225                    |
| eIF4G.S1108                    | 0.004730225                    |
| GSK.3beta.S9                   | 0.004730225                    |
| ATR.S428                       | 0.004730225                    |
| YAP.S127                       | 0.004730225                    |
| FADD.S194                      | 0.004730225                    |
| PI3.Kinase                     | 0.004730225                    |
| Mn.Superoxide.Dismutase        | 0.004730225                    |
| BIM                            | 0.004730225                    |
| Rb.S780                        | 0.004730225                    |
| S6.Ribosomal.Protein.S235.236  | 0.004730225                    |
| AR.S81                         | 0.004730225                    |
| Heme.Oxygenase.1               | 0.004730225                    |
| PARP.cleaved.D214              | 0.006880327                    |
| IRS.1.S612                     | 0.008649554                    |
| BLVRB..Biliverdin.Reductase.B. | 0.008649554                    |
| MEK.1.2.S217.221               | 0.009958368                    |
| Caspase.7.Cleaved.D198         | 0.009958368                    |
| GSK.3alpha.Y279.beta.Y216      | 0.009958368                    |

|                             |             |
|-----------------------------|-------------|
| FAK.Y397                    | 0.01164363  |
| Acetyl.CoA.Carboxylase.S79  | 0.013244629 |
| PUMA                        | 0.014415923 |
| Ras..RAS10.                 | 0.014415923 |
| Chk.1.S345                  | 0.016102892 |
| CDK2                        | 0.016102892 |
| MARCKS.S152.156             | 0.016102892 |
| Catenin.beta.S33.37.T41     | 0.016102892 |
| Bcl.2                       | 0.016102892 |
| MSK1.S360                   | 0.021191406 |
| FKHR.FOX01.S256             | 0.021191406 |
| Histone.H3.S28              | 0.021191406 |
| p70S6.Kinase.T389           | 0.027521307 |
| Bcl.xL                      | 0.027521307 |
| IGF.1.Rec.Y1131.IR.Y1146    | 0.027521307 |
| PKC.alpha.S657              | 0.027521307 |
| LAMP.2                      | 0.027521307 |
| ERCC1                       | 0.037177906 |
| FOXM1.T600                  | 0.037177906 |
| ALDH2                       | 0.038570478 |
| 4EBP1.T70                   | 0.040283203 |
| Lck.Y505                    | 0.040283203 |
| Elk.1.S383                  | 0.040283203 |
| PLC.gamma.1                 | 0.040283203 |
| Cytochrome.C.oxidoreductase | 0.045650422 |
| PTEN.TOTAL                  | 0.047302246 |
| Ras.GRF1.S916               | 0.049309008 |
| p27.T187                    | 0.049309008 |

PDAC cell lines were treated with vehicle (DMSO) or SCH772984 (ERKi, 1  $\mu$ M) for 1 or 24 h. Three independent experiments were prepared and reverse-phase protein array (RPPA) analysis was performed. RPPA expression data for 24 h SCH772984 treatment samples were standardized to 24 h DMSO treated samples. Data were log<sub>2</sub> transformed and medians of three independent experiments are represented in the heat map. Only proteins with statistically significant ( $p < 0.05$ , FDR corrected, Wilcoxon test) changes 24 h are shown.
